# Supplementary material for: Copper-catalyzed synthesis of 1,3,5-triarylpentane-1,5-diones from α,β-unsaturated ketones
Source: Royal Society of Chemistry journal article supplement (doi:10.1039/c5ra09155a), 2015-01-01
Supplement: c5ra09155a1.pdf [file c5ra09155a1.pdf]

## Supporting Information

### Copper-catalyzed Synthesis of 1,3,5-Triarylpentane-1,5-diones from $\alpha,\beta$ -Unsaturated Ketones

Zheng Li,\* Gong Wen, Lili He, Jiasheng Li, Xianggui Jia, Jingya Yang

College of Chemistry and Chemical Engineering, Northwest Normal University,

Lanzhou, Gansu, 730070, P. R. China

The IR,  $^1\text{H}$  NMR, and  $^{13}\text{C}$  NMR spectra for the products.

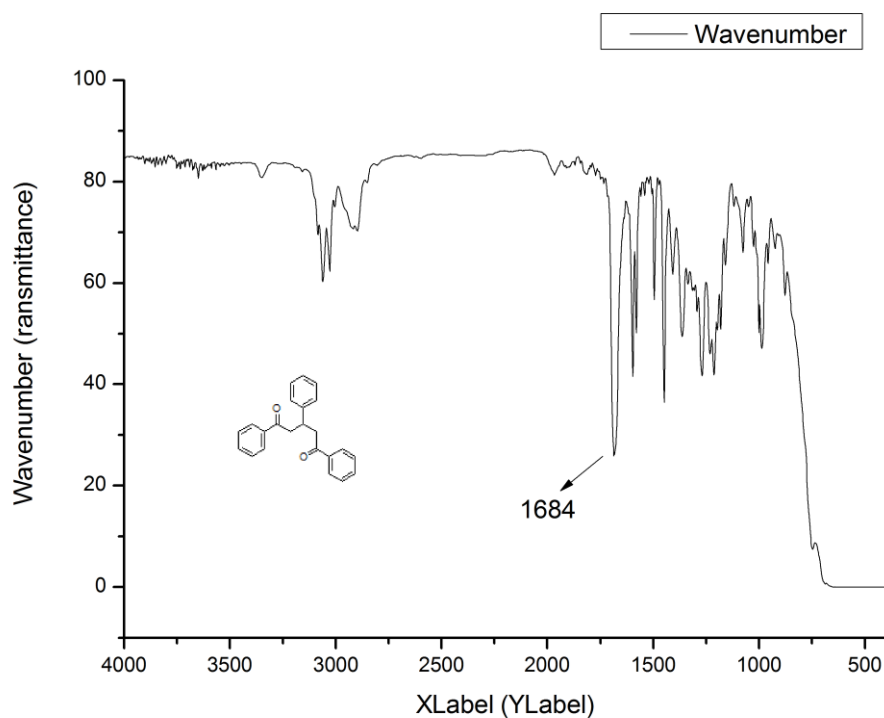

Fig 1. IR of 1,3,5-triphenyl-pentane-1,5-dione (2a)

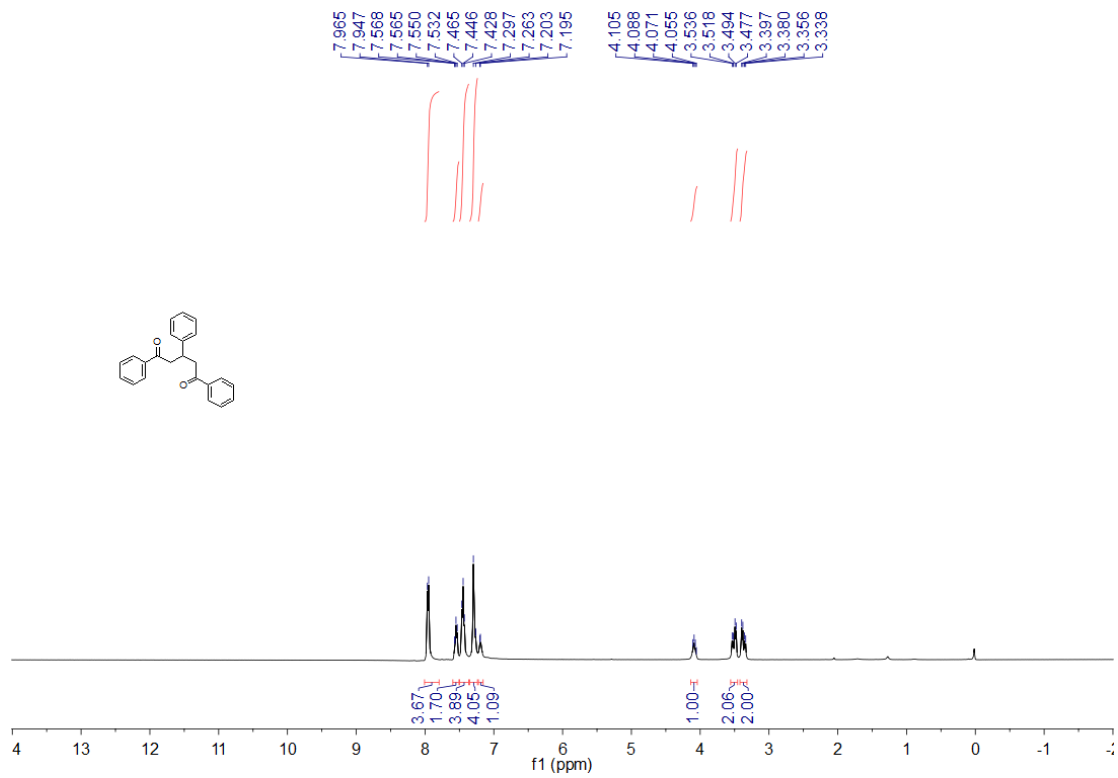

Fig 2. <sup>1</sup>H NMR of 1,3,5-triphenyl-pentane-1,5-dione (2a)

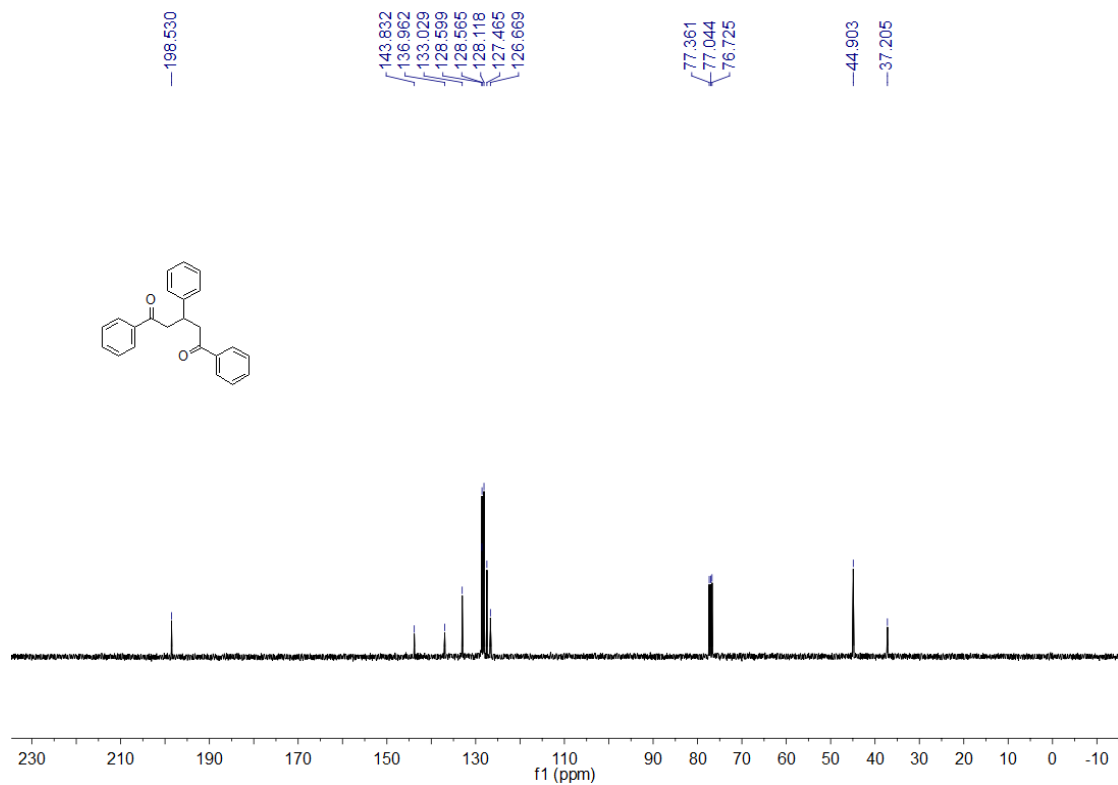

Fig 3. <sup>13</sup>C NMR of 1,3,5-triphenyl-pentane-1,5-dione (2a)

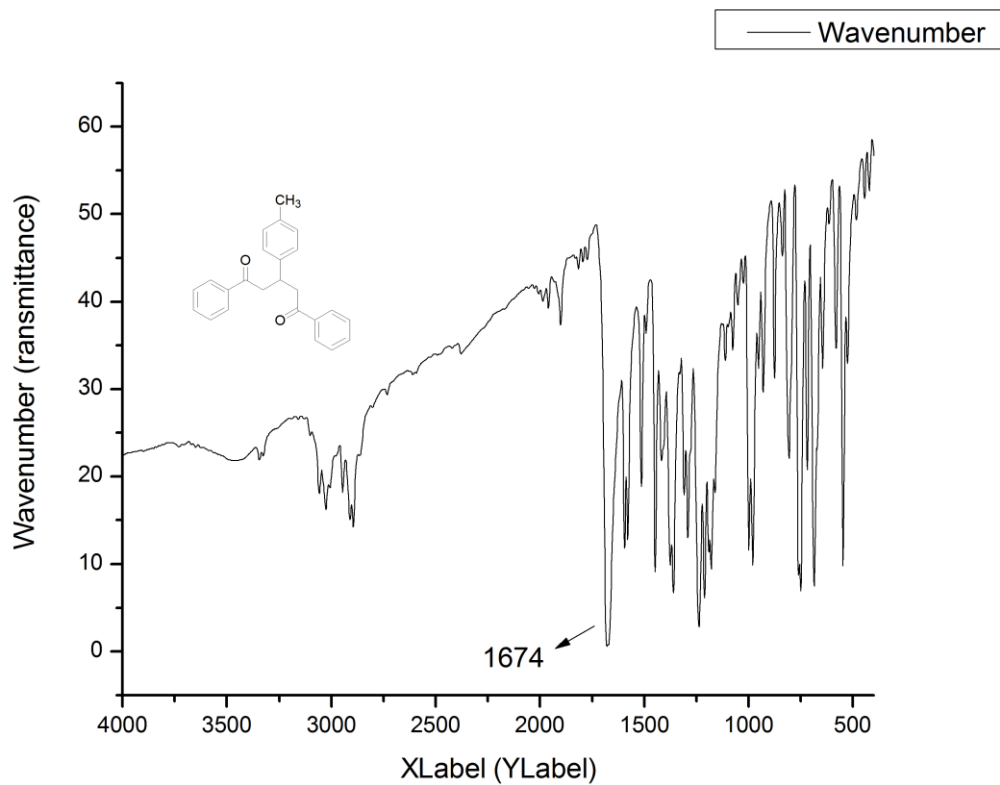

Fig 4. IR of 1,5-diphenyl-3-*p*-tolyl-pentane-1,5-dione (2b)

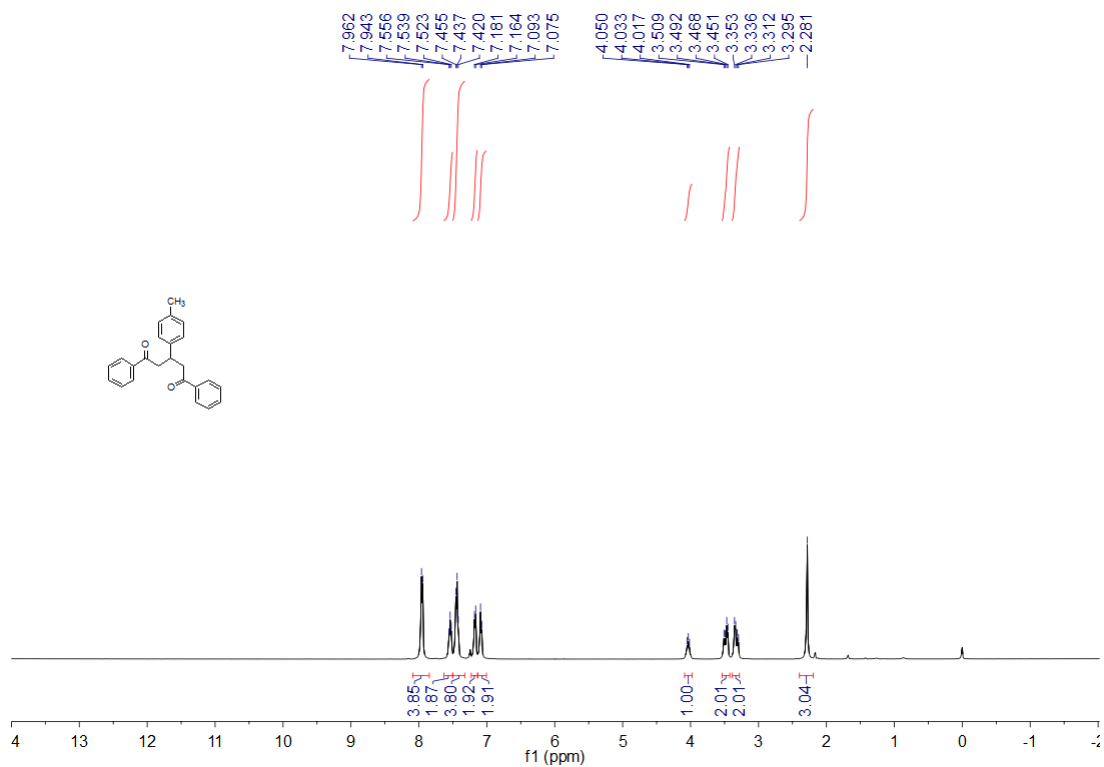

Fig 5.  $^1\text{H}$  NMR of 1,5-diphenyl-3-*p*-tolyl-pentane-1,5-dione (2b)

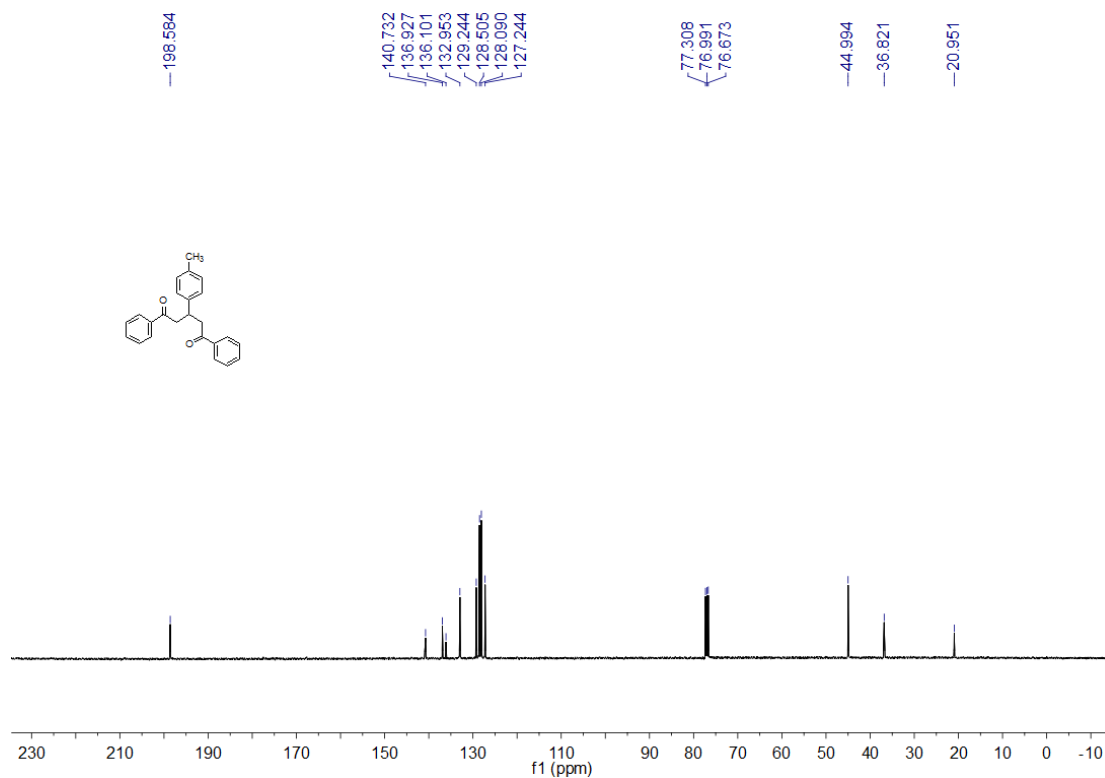

Fig 6.  $^{13}\text{C}$  NMR of 1,5-diphenyl-3-p-tolyl-pentane-1,5-dione (2b)

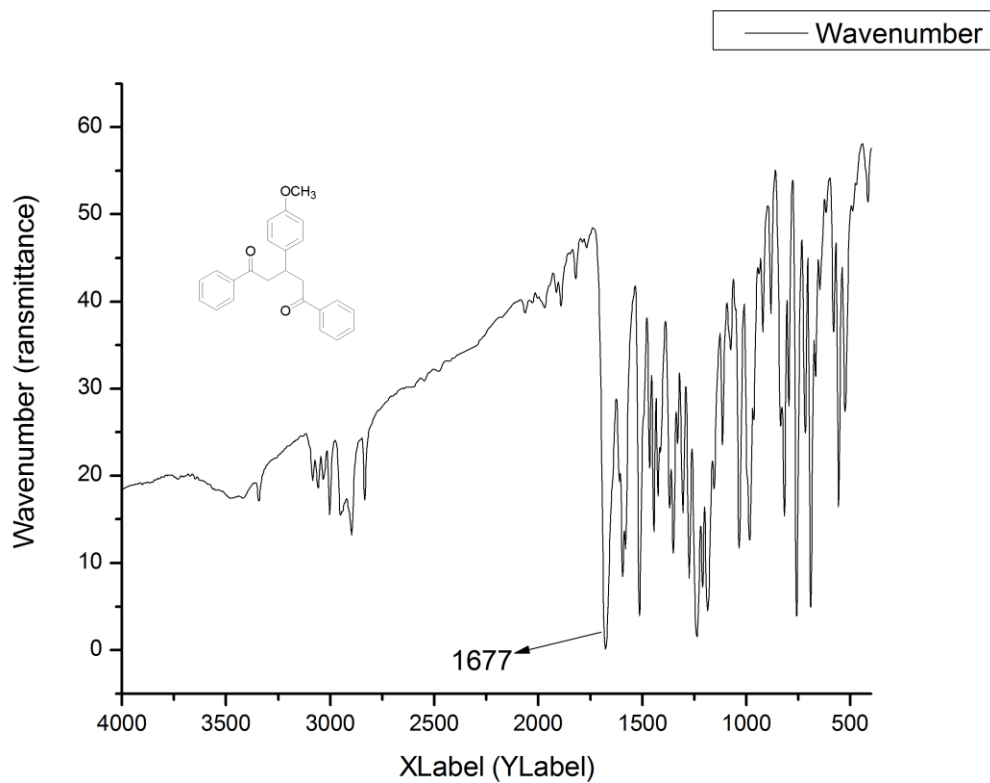

Fig 7. IR of 3-(4-methoxyphenyl)-1,5-diphenyl-pentane-1,5-dione (2c)

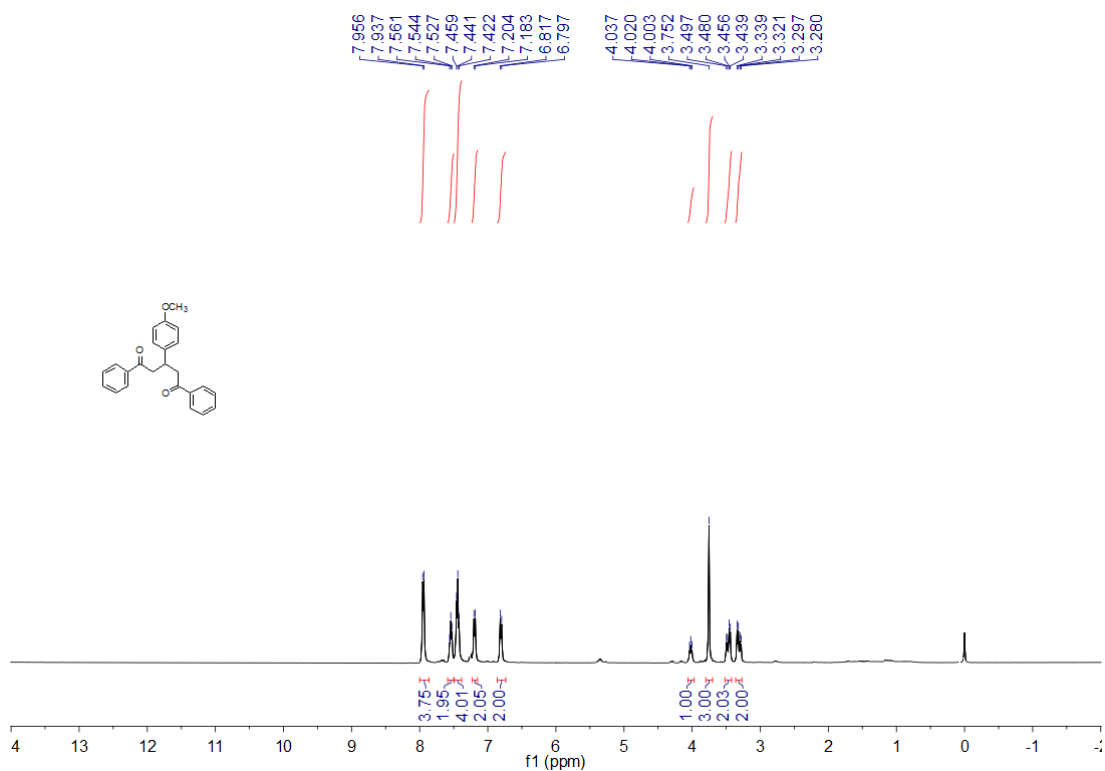

Fig 8. <sup>1</sup>H NMR of 3-(4-methoxyphenyl)-1,5-diphenyl-pentane-1,5-dione (2c)

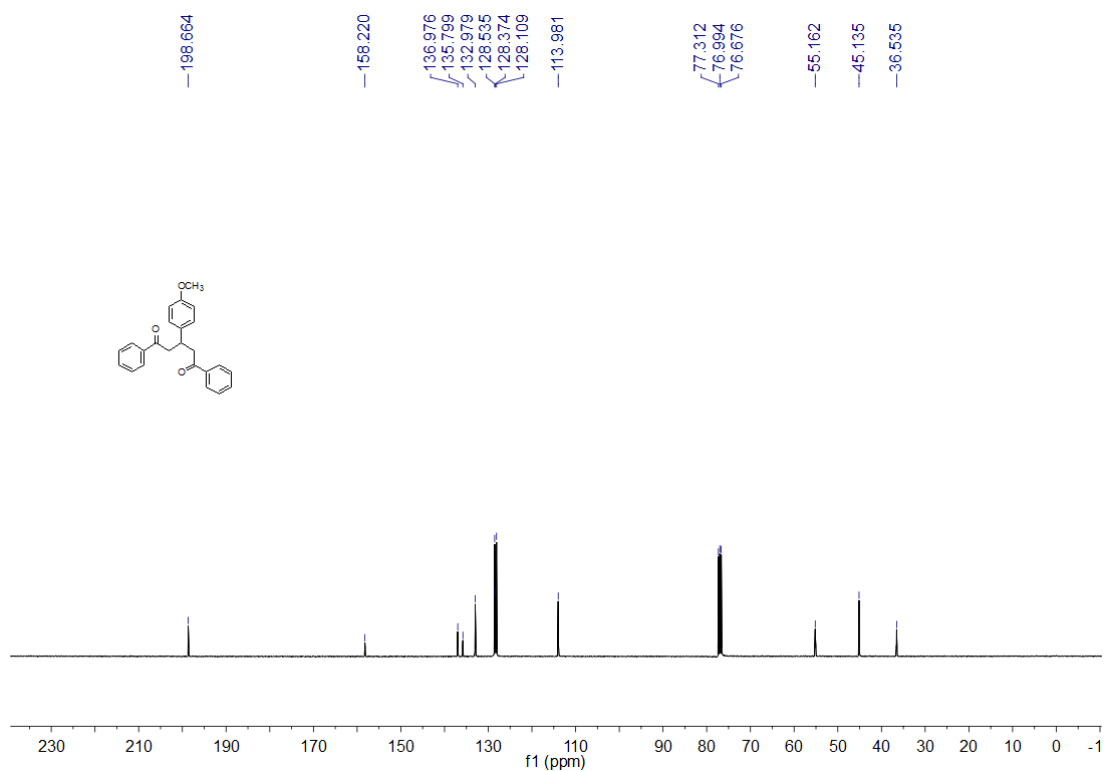

Fig 9. <sup>13</sup>C NMR of 3-(4-methoxyphenyl)-1,5-diphenyl-pentane-1,5-dione (2c)

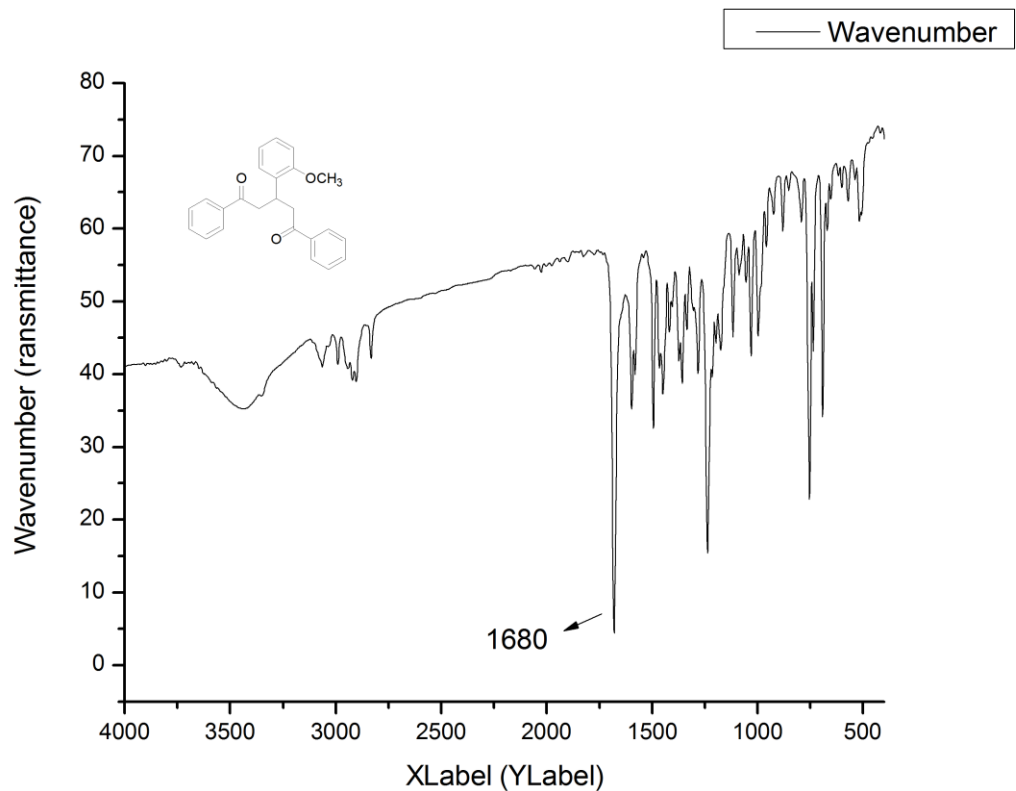

Fig 10. IR of 3-(2-methoxyphenyl)-1,5-diphenylpentane-1,5-dione (2d)

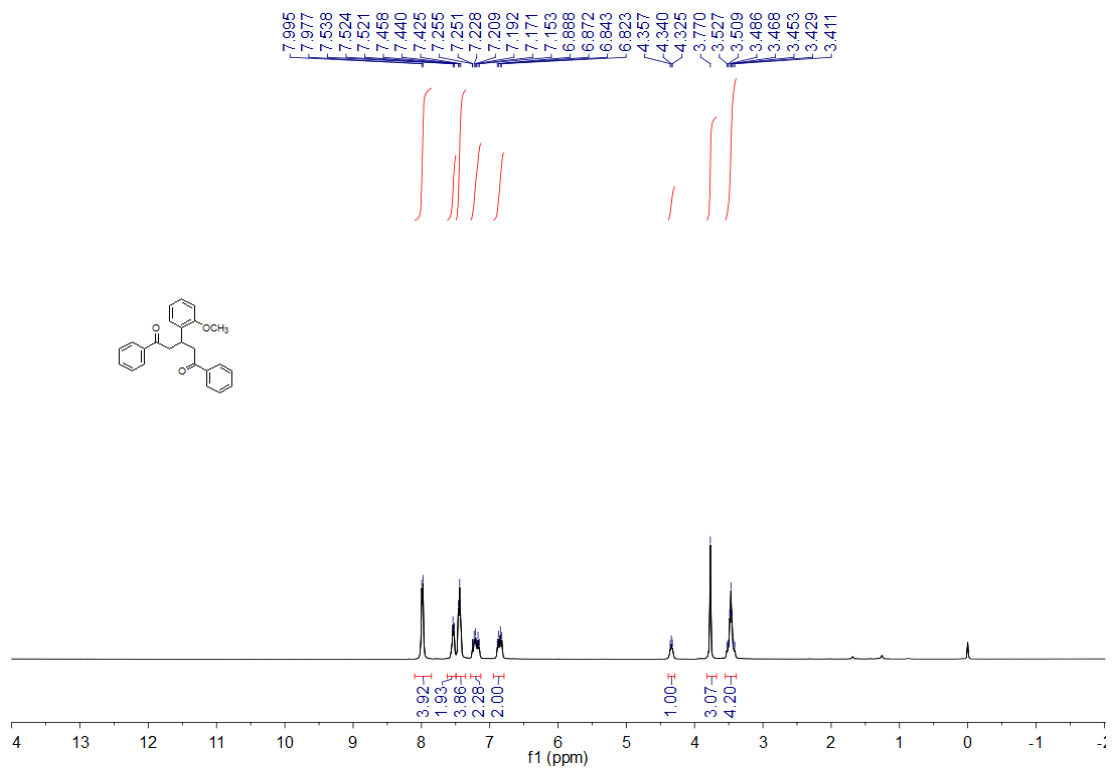

Fig 11. <sup>1</sup>H NMR of 3-(2-methoxyphenyl)-1,5-diphenylpentane-1,5-dione (2d)

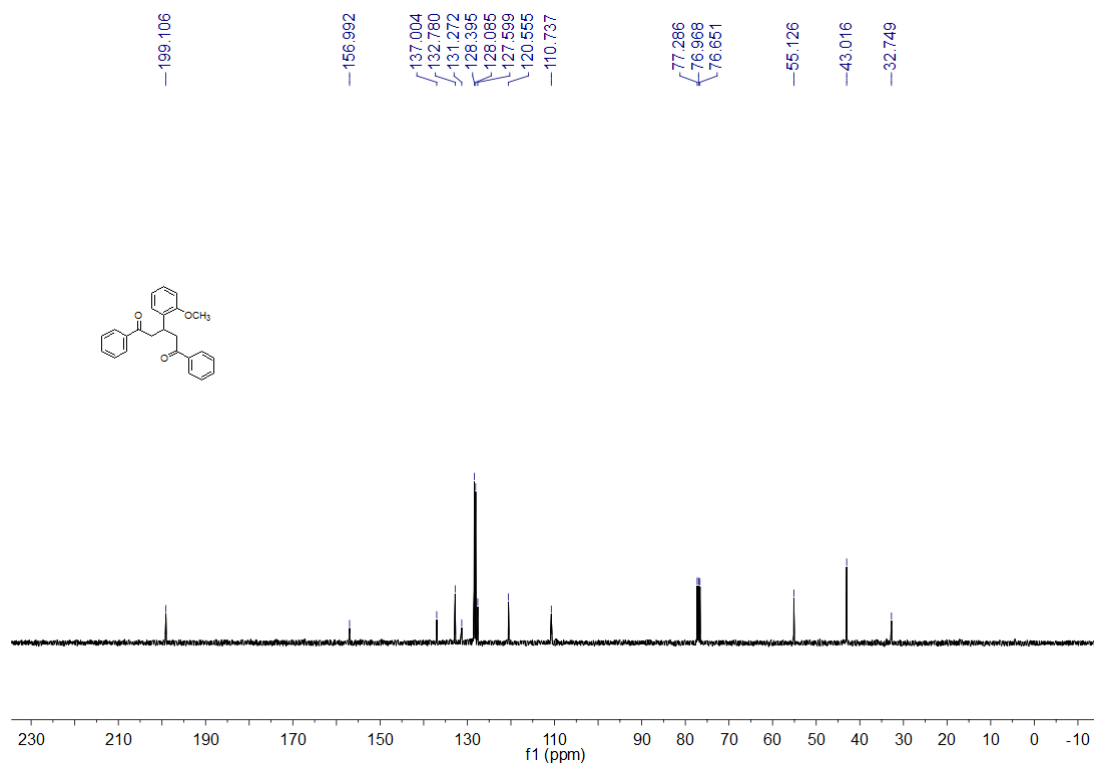

Fig 12.  $^{13}\text{C}$  NMR of 3-(2-methoxyphenyl)-1,5-diphenylpentane-1,5-dione (2d)

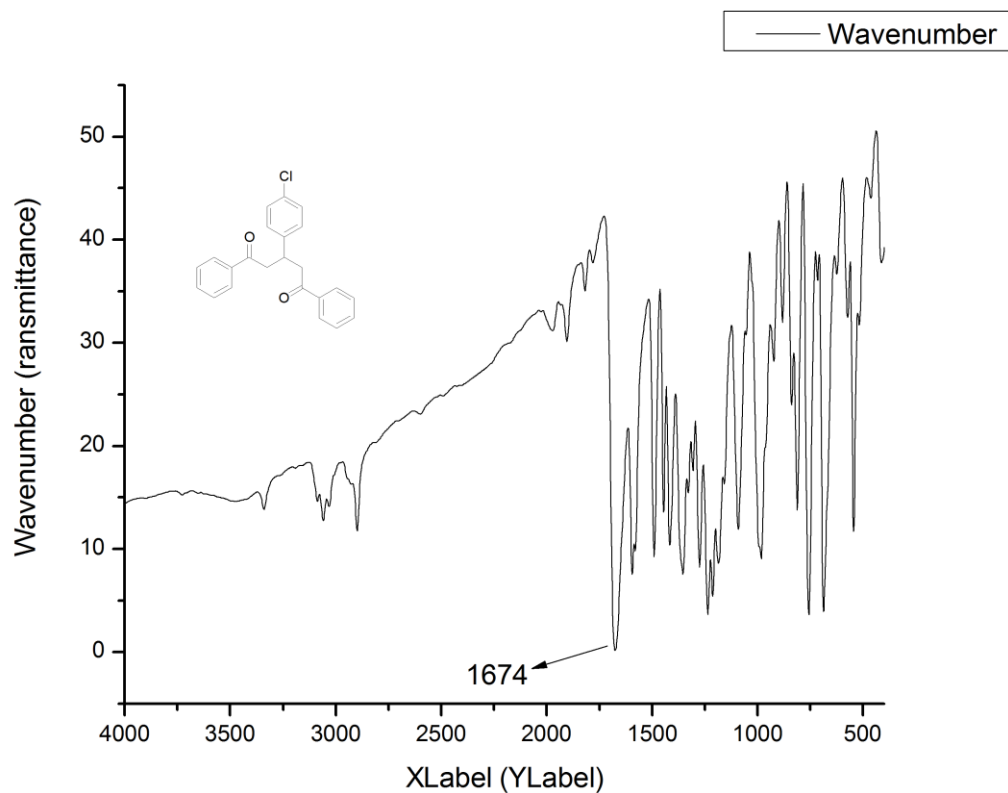

Fig 13. IR of 3-(4-chloro-phenyl)-1,5-diphenylpentane-1,5-dione (2e)

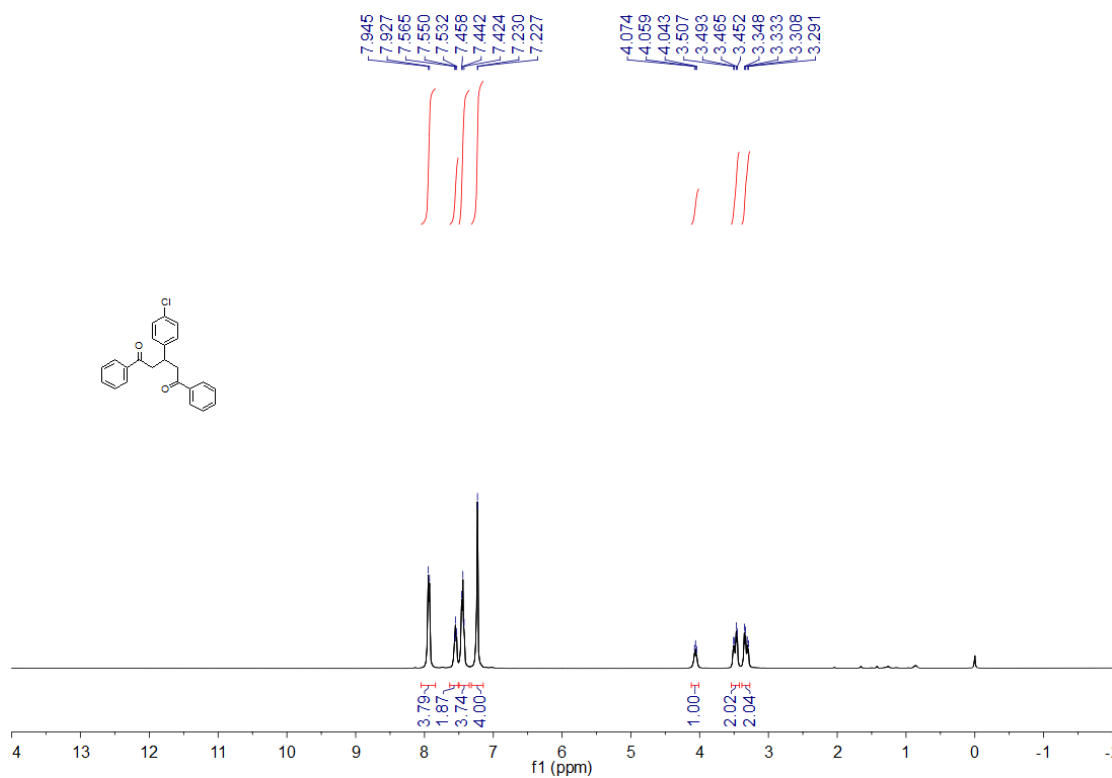

Fig 14. <sup>1</sup>H NMR of 3-(4-chlorophenyl)-1,5-diphenylpentane-1,5-dione (2e)

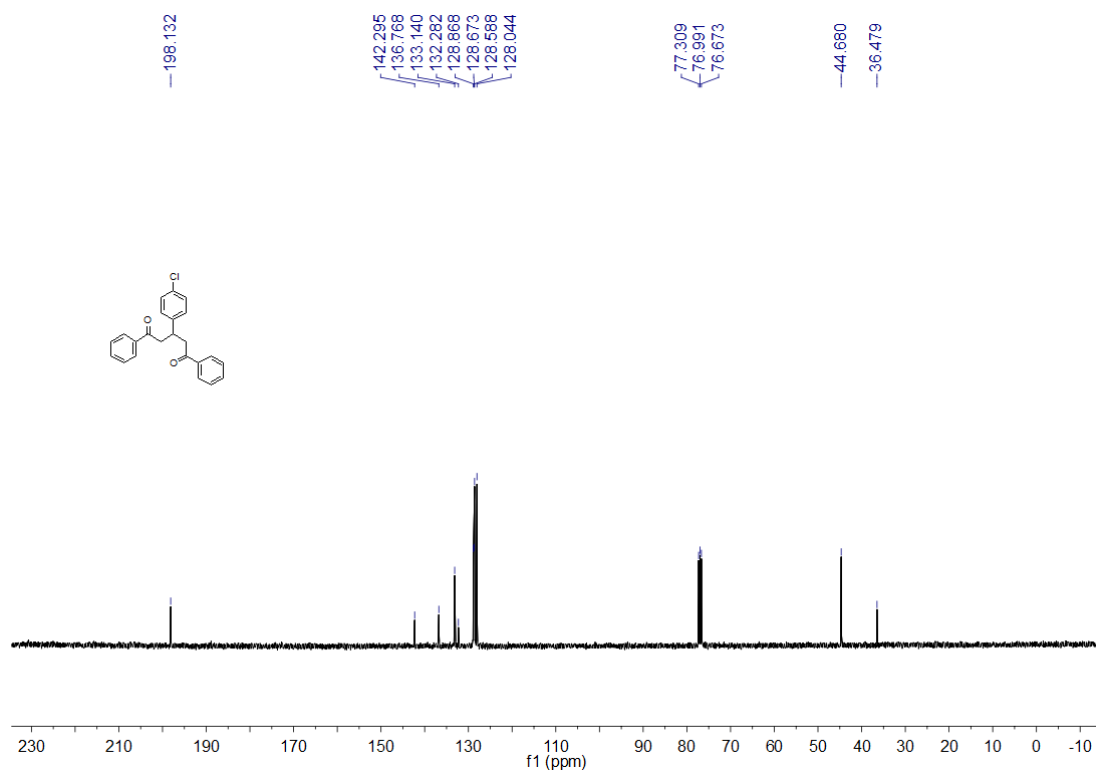

Fig 15. <sup>13</sup>C NMR of 3-(4-chlorophenyl)-1,5-diphenylpentane-1,5-dione (2e)



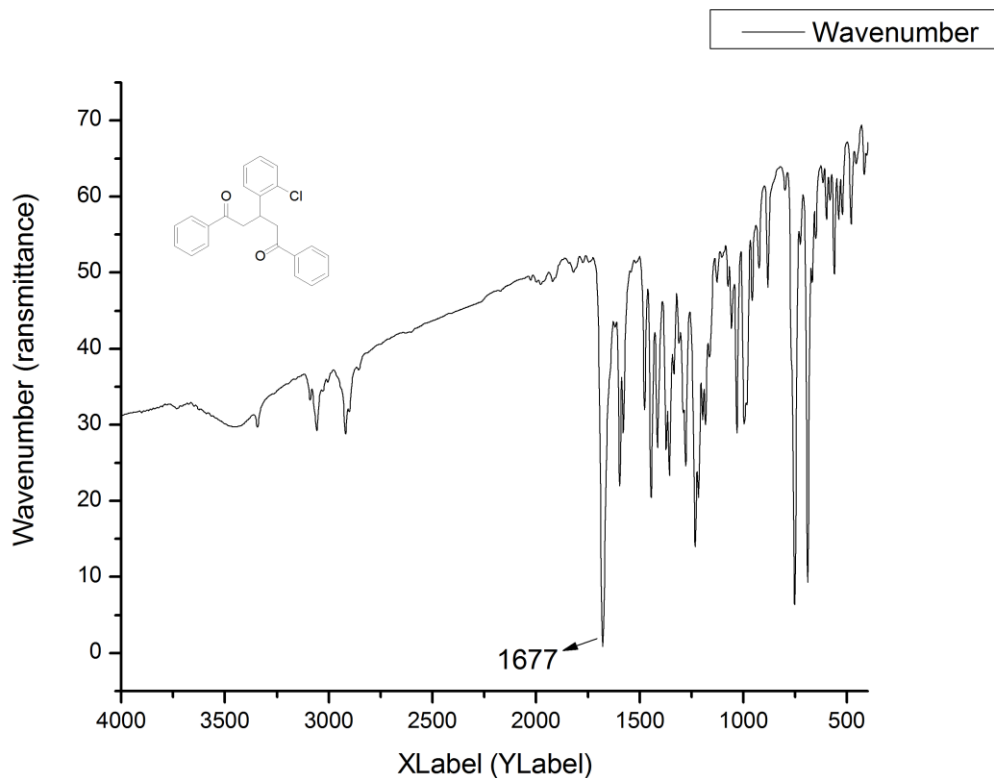

Fig 16. IR of 3-(2-chloro-phenyl)-1,5-diphenylpentane-1,5-dione (2f)

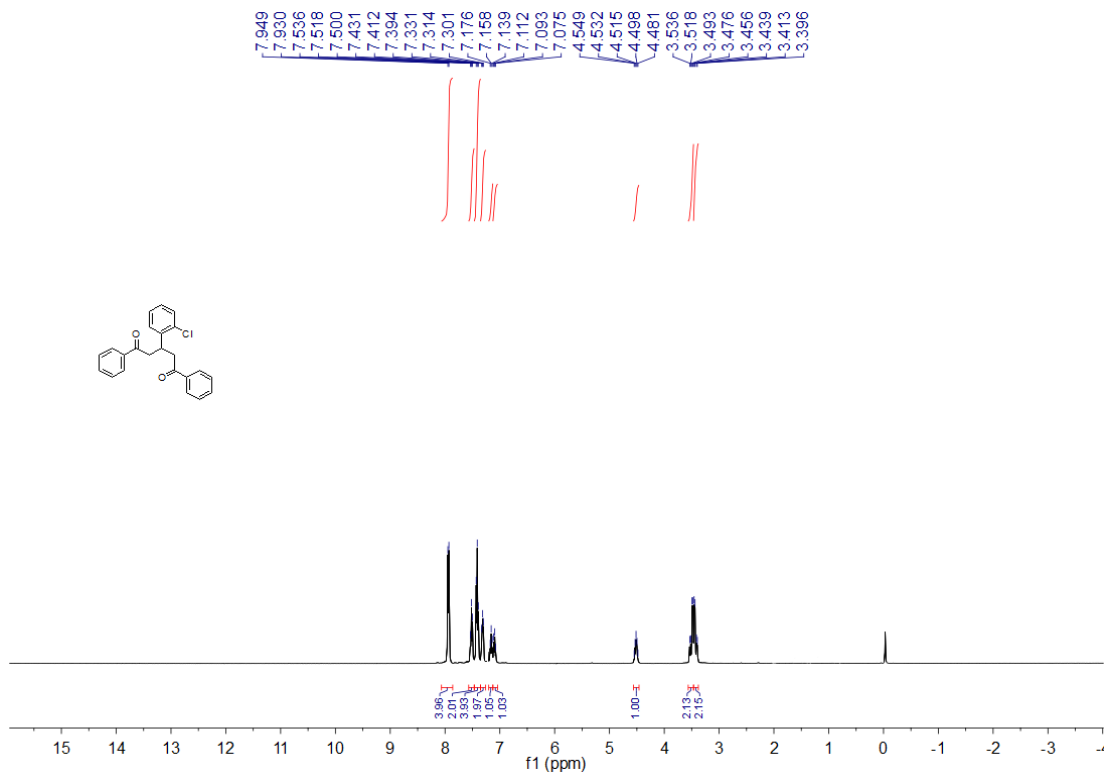

Fig 17. <sup>1</sup>H NMR of 3-(2-chloro-phenyl)-1,5-diphenylpentane-1,5-dione (2f)

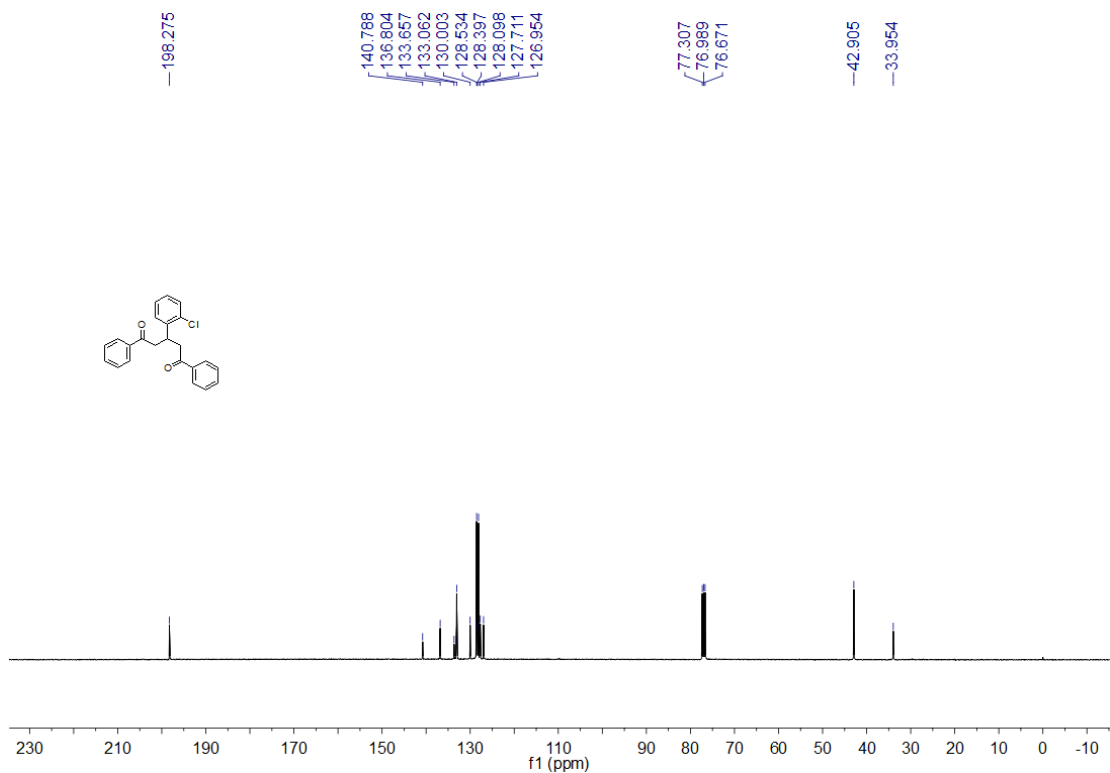

Fig 18. <sup>13</sup>C NMR of 3-(2-chlorophenyl)-1,5-diphenylpentane-1,5-dione (2f)

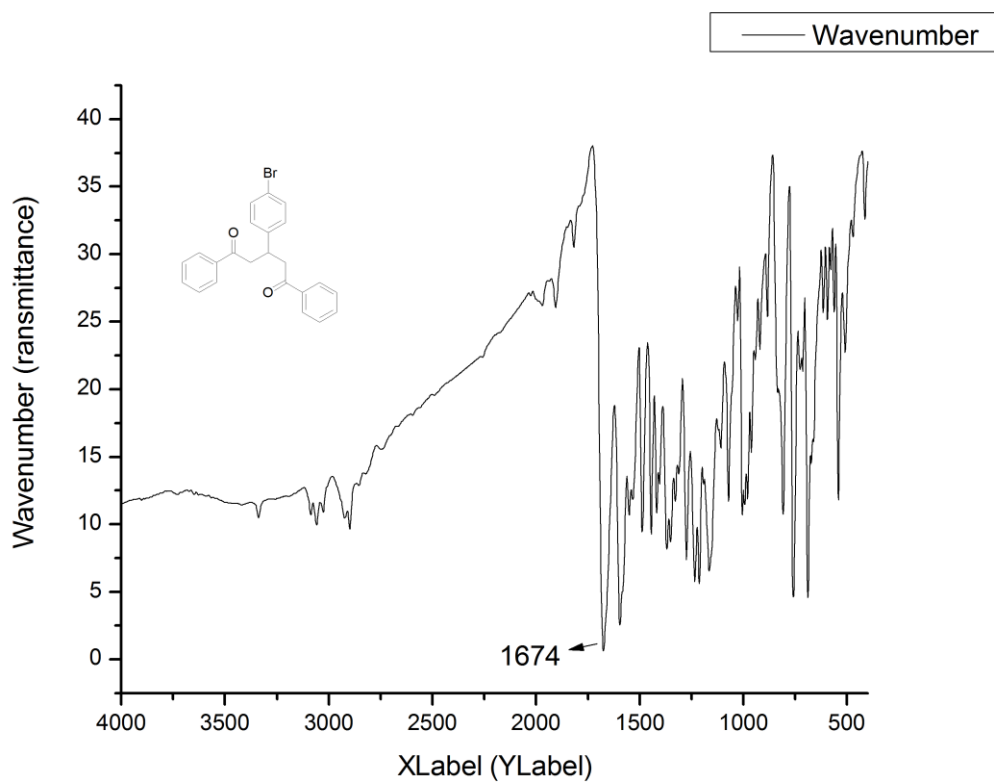

Fig 19. IR of 3-(4-bromophenyl)-1,5-diphenylpentane-1,5-dione (2g)

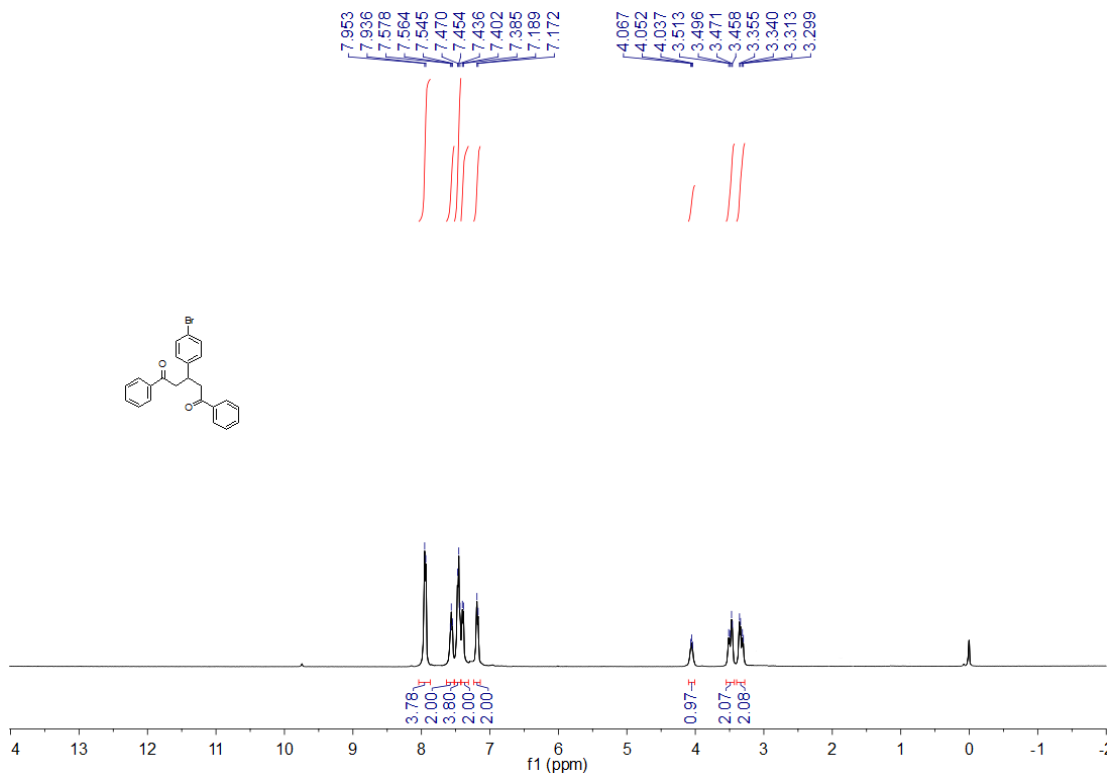

Fig 20. <sup>1</sup>H NMR of 3-(4-bromophenyl)-1,5-diphenylpentane-1,5-dione (2g)

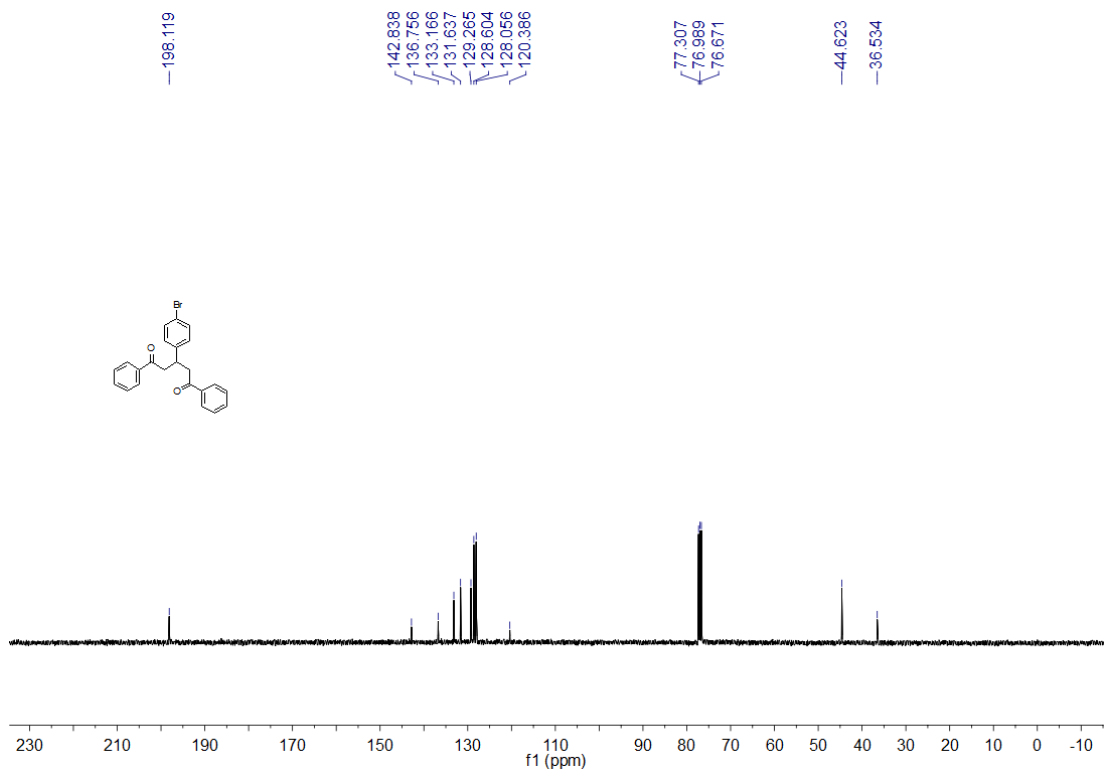

Fig 21. <sup>13</sup>C NMR of 3-(4-bromophenyl)-1,5-diphenylpentane-1,5-dione (2g)

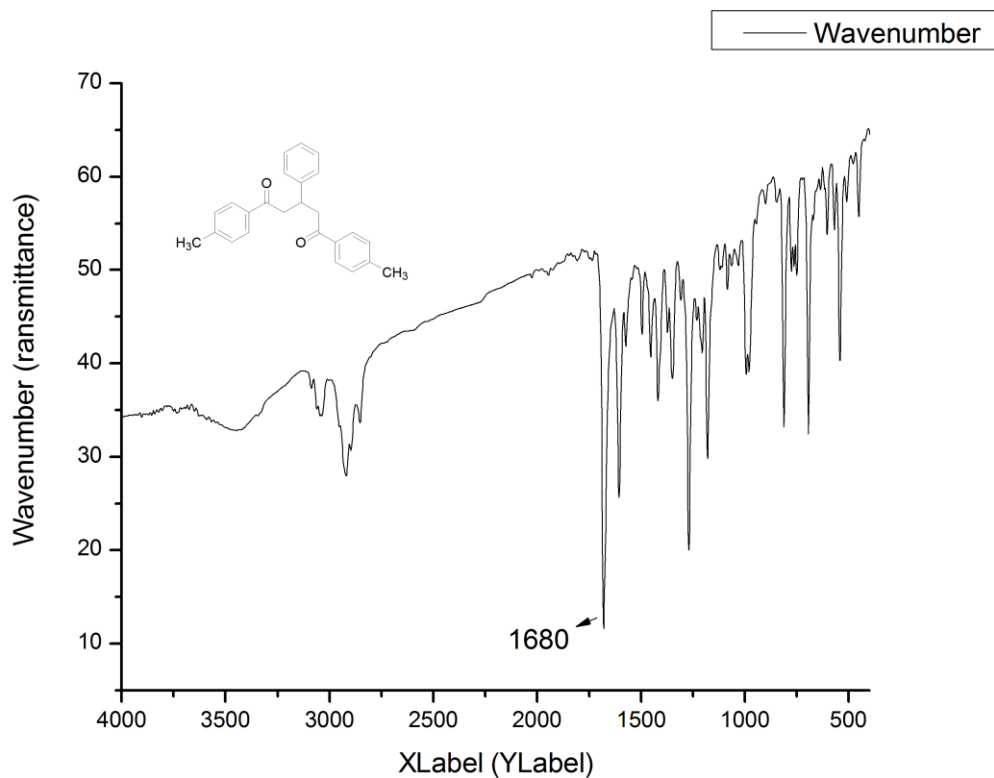

Fig 22. IR of 1,5-bis-(4-methoxy-phenyl)-3-phenyl-pentane-1,5-dione (2h)

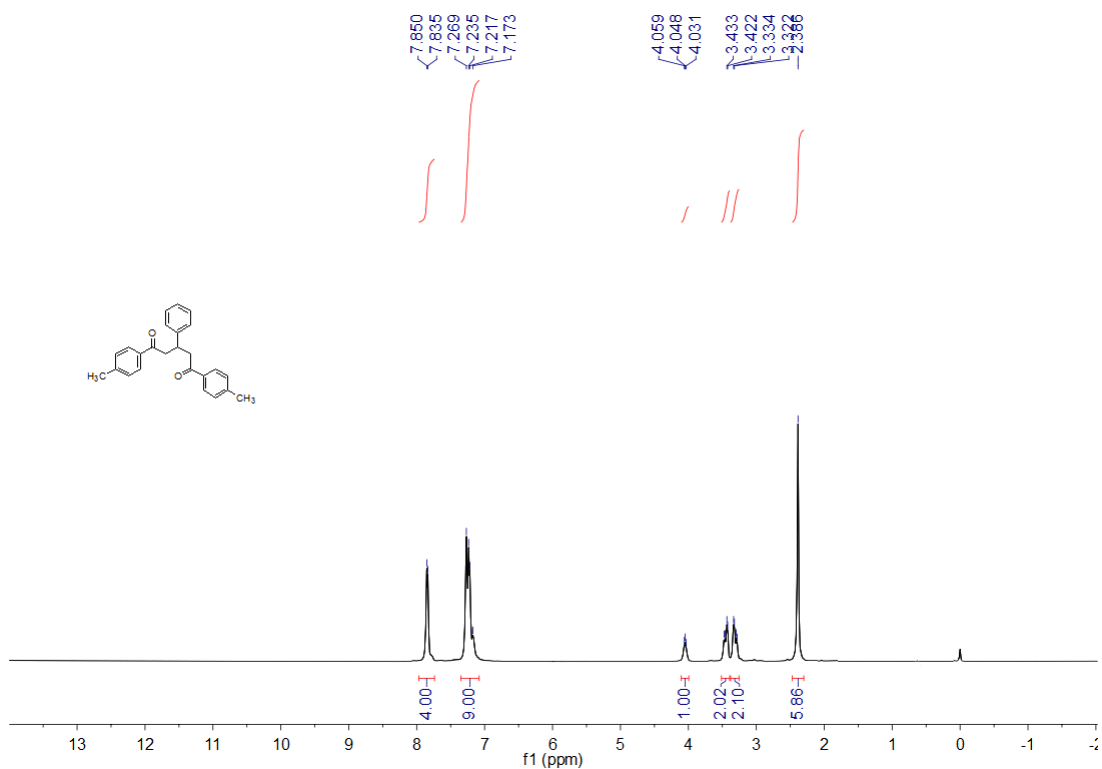

Fig 23.  $^1\text{H}$  NMR of 1,5-bis-(4-methoxy-phenyl)-3-phenyl-pentane-1,5-dione (2h)

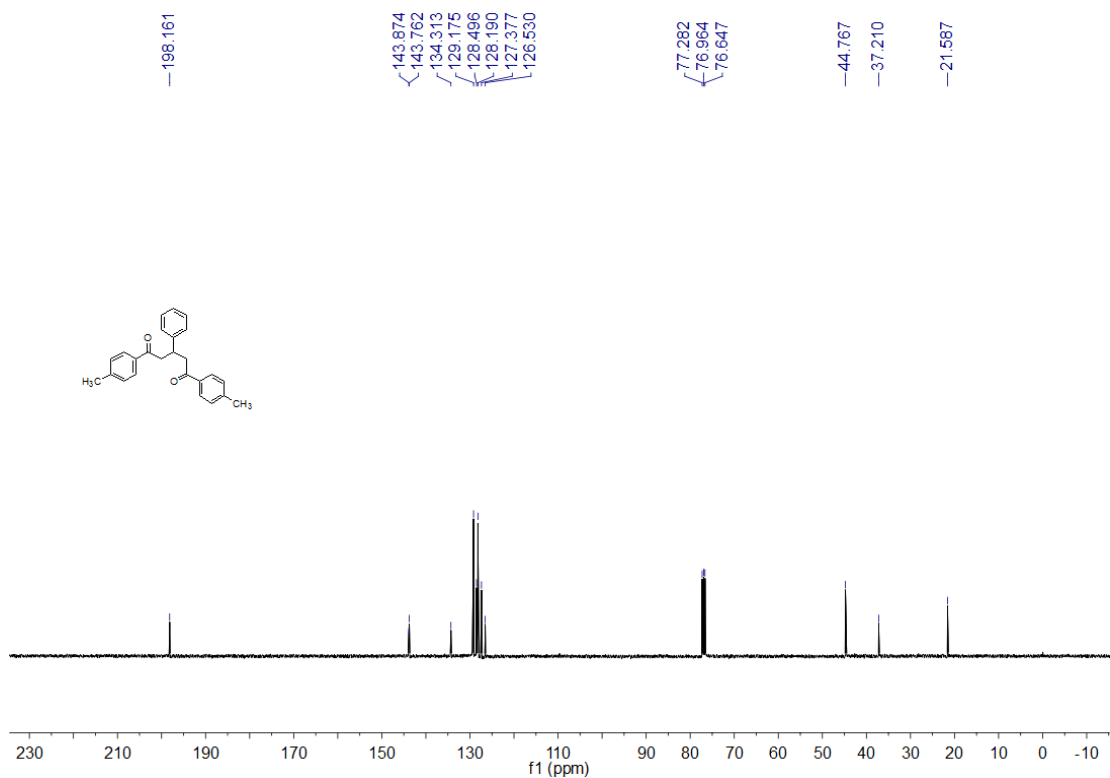

Fig 24.  $^{13}\text{C}$  NMR of 1,5-bis-(4-methoxy-phenyl)-3-phenyl-pentane-1,5-dione (2h)

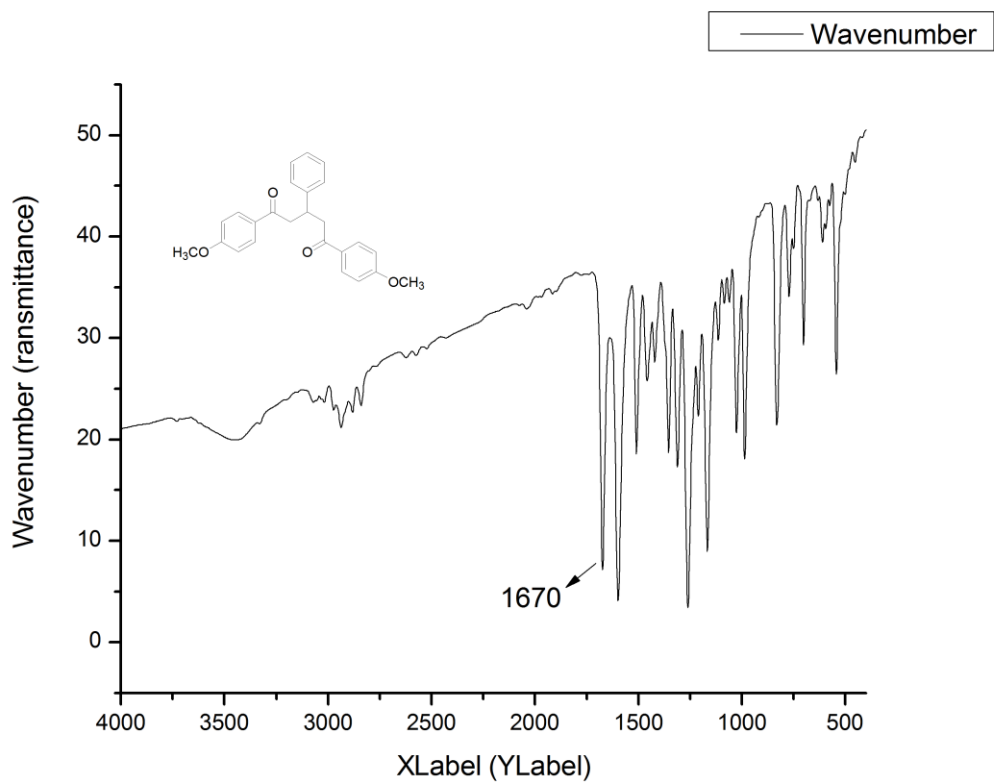

Fig 25. IR of 1,5-bis-(4-methoxy-phenyl)-3-phenyl-pentane-1,5-dione (2i)

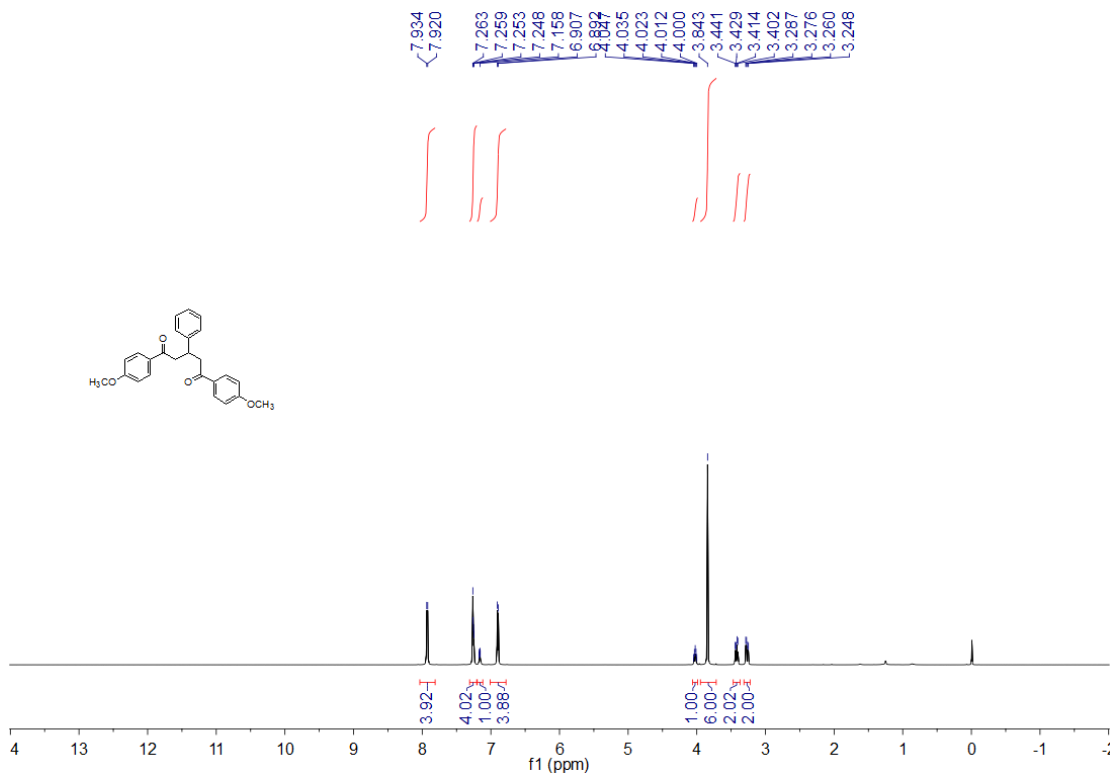

Fig 26. <sup>1</sup>H NMR of 1,5-bis-(4-methoxy-phenyl)-3-phenyl-pentane-1,5-dione (2i)

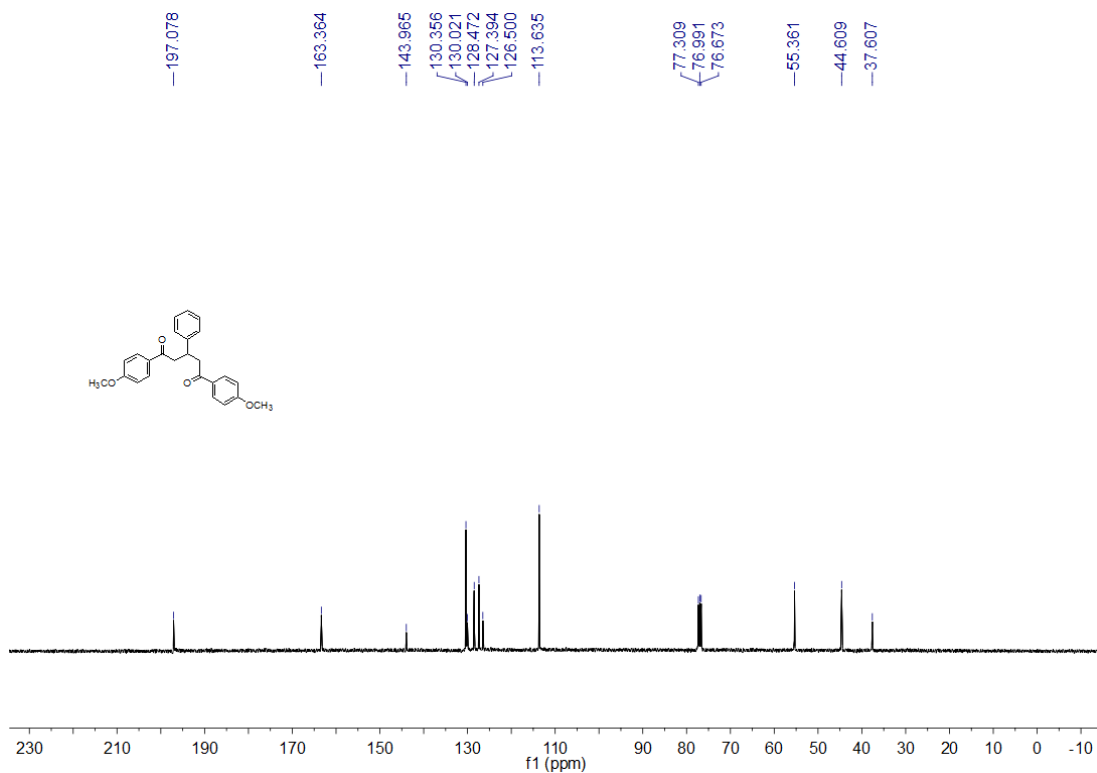

Fig 27. <sup>13</sup>C NMR of 1,5-bis-(4-methoxy-phenyl)-3-phenyl-pentane-1,5-dione (2i)

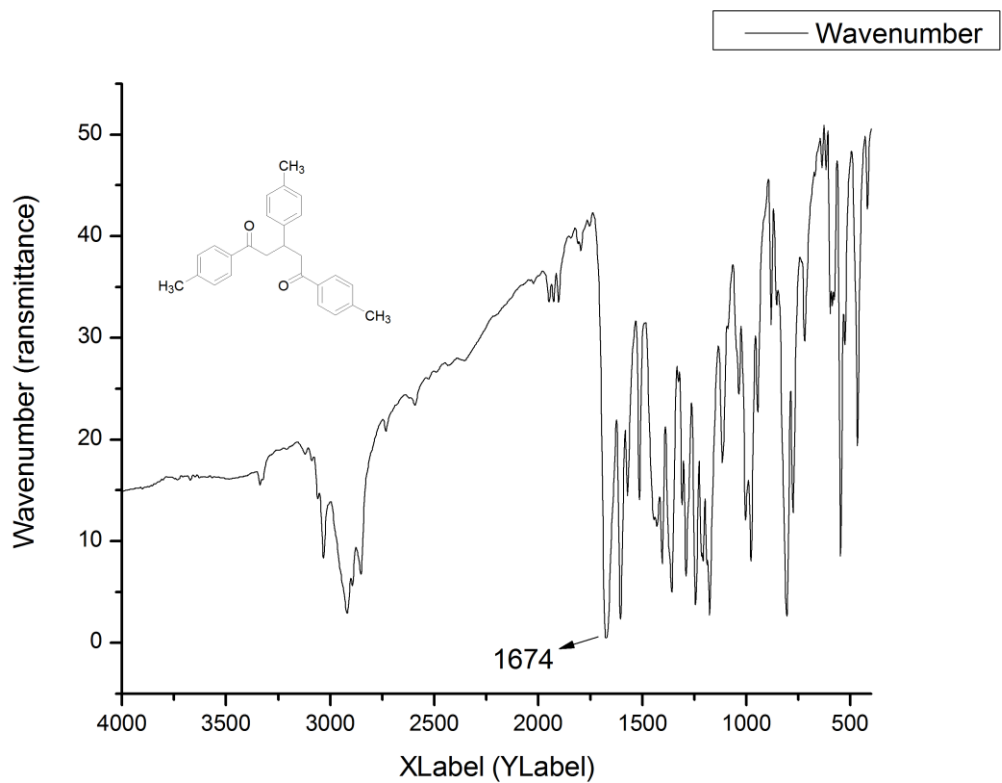

Fig 28. IR of 1,3,5-tri-*p*-tolyl-pentane-1,5-dione (2j)

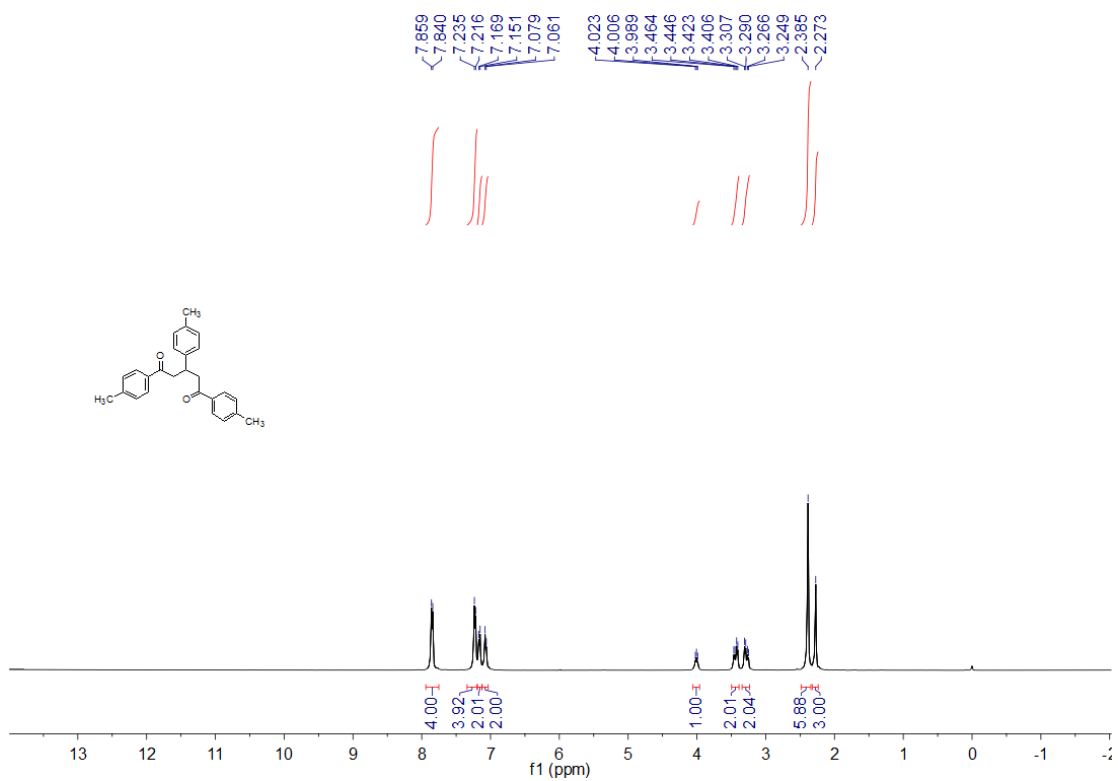

Fig 29.  $^1\text{H}$  NMR of 1,3,5-tri-*p*-tolyl-pentane-1,5-dione (2j)

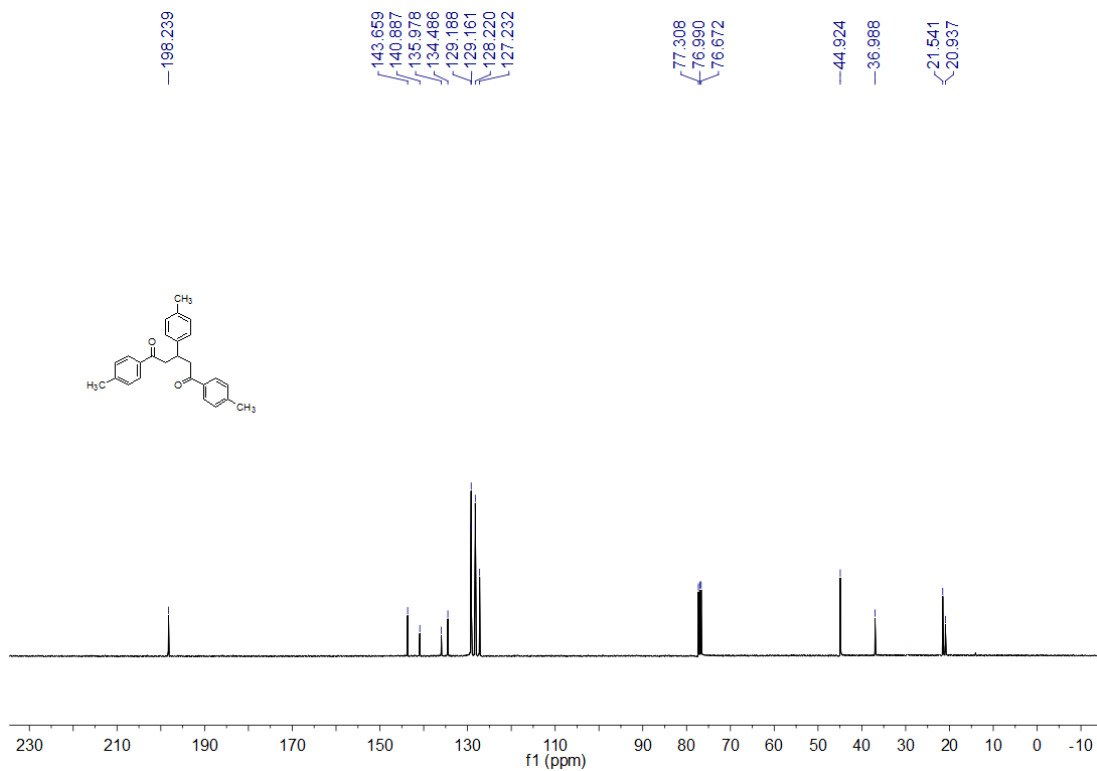

Fig 30.  $^{13}\text{C}$  NMR of 1,3,5-tri-*p*-tolyl-pentane-1,5-dione (2j)

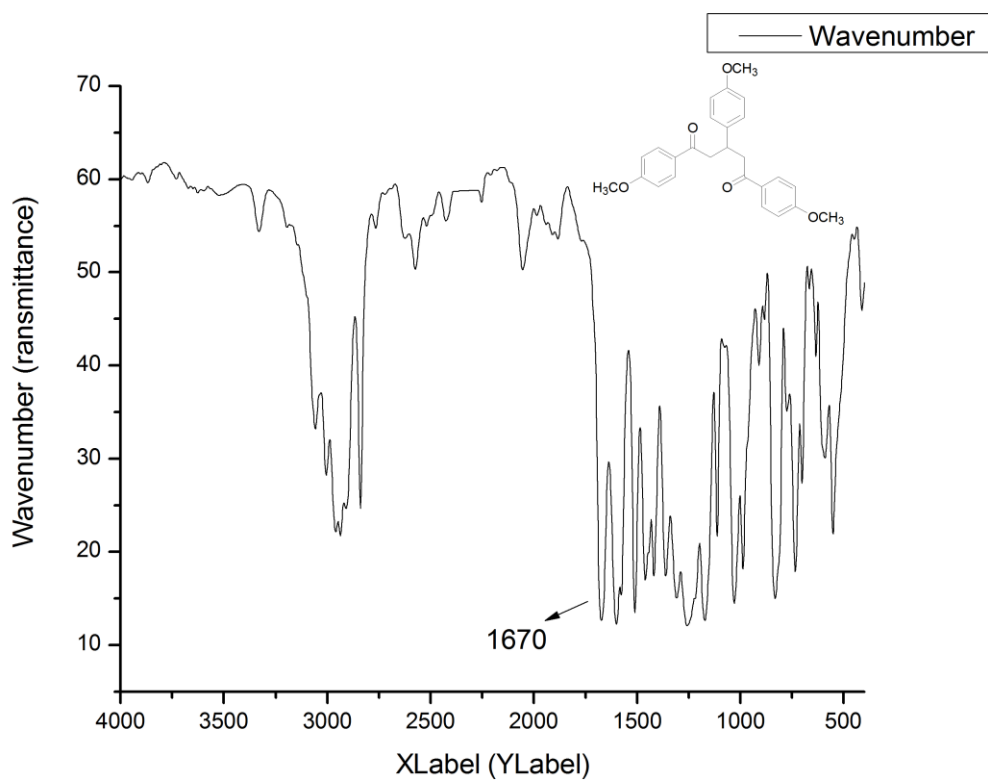

Fig 31. IR of 1,3,5-tris-(4-methoxy-phenyl)-pentane-1,5-dione (2k)



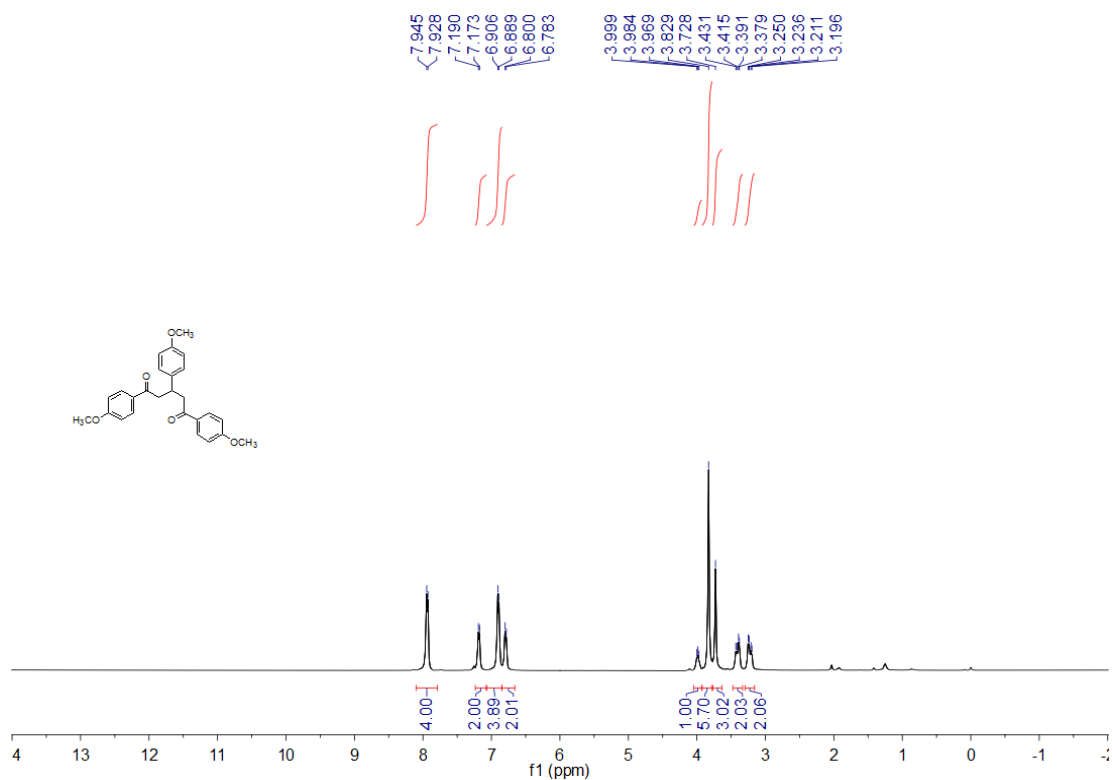

Fig 32. <sup>1</sup>H NMR of 1,3,5-tris-(4-methoxy-phenyl)-pentane-1,5-dione (2k)

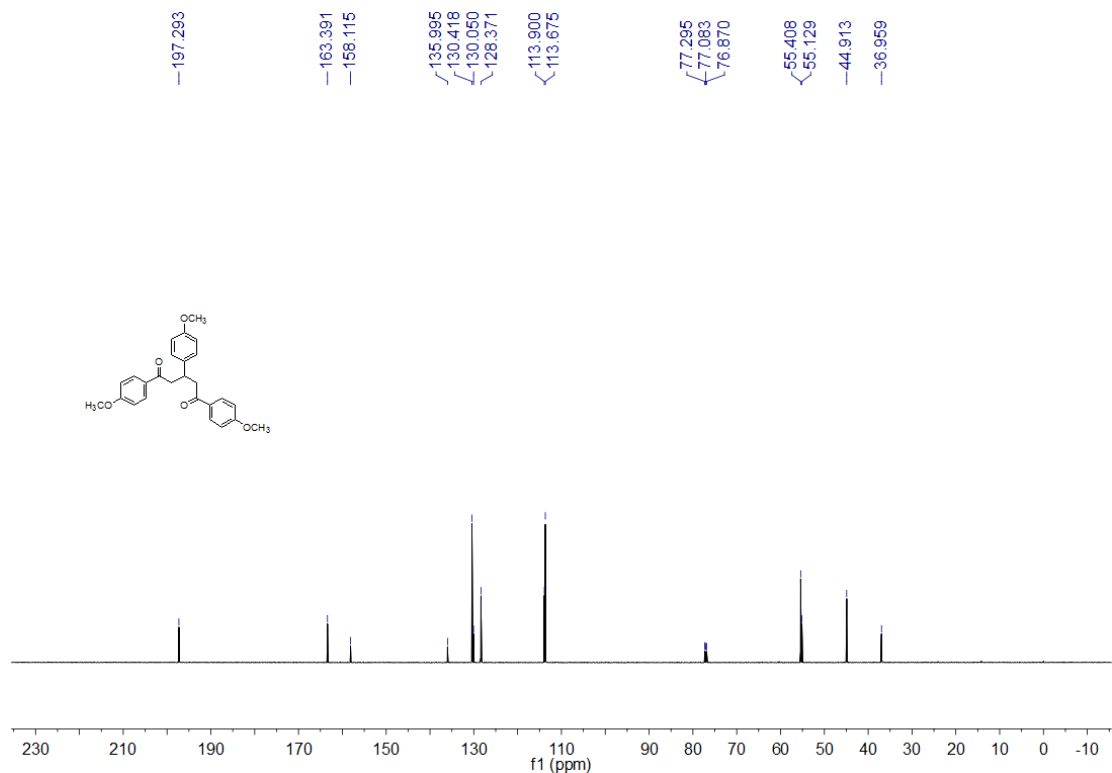

Fig 33. <sup>13</sup>C NMR of 1,3,5-tris-(4-methoxy-phenyl)-pentane-1,5-dione (2k)

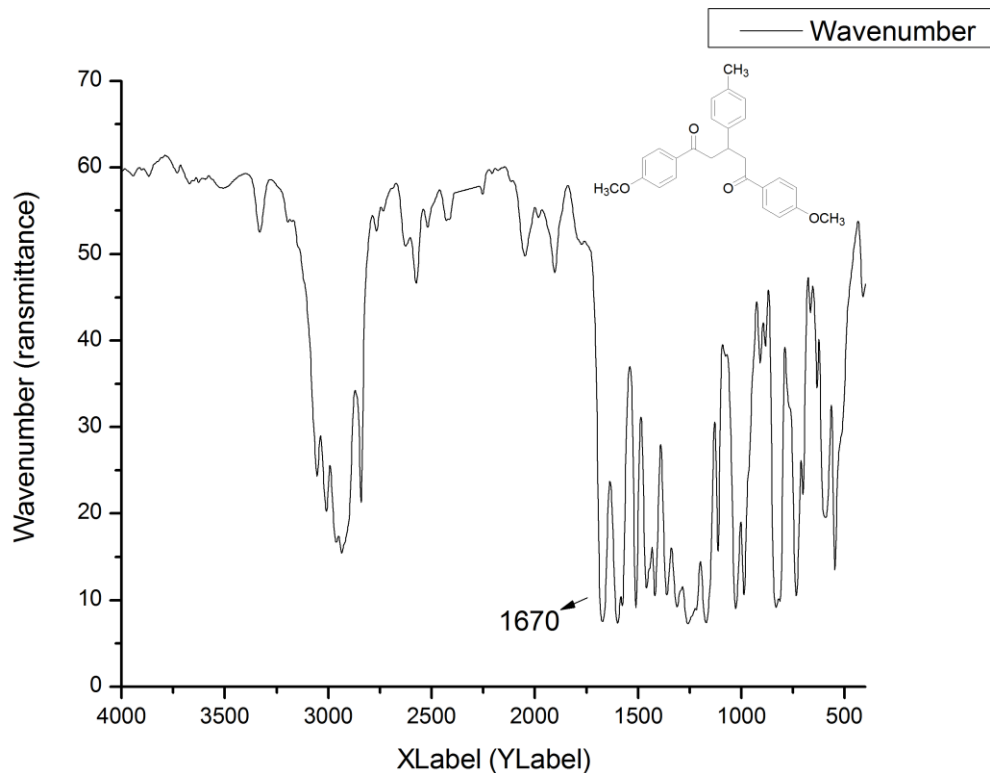

Fig 34. IR of 1,5-bis-(4-methoxy-phenyl)-3-*p*-tolyl-pentane-1,5-dione (2l)

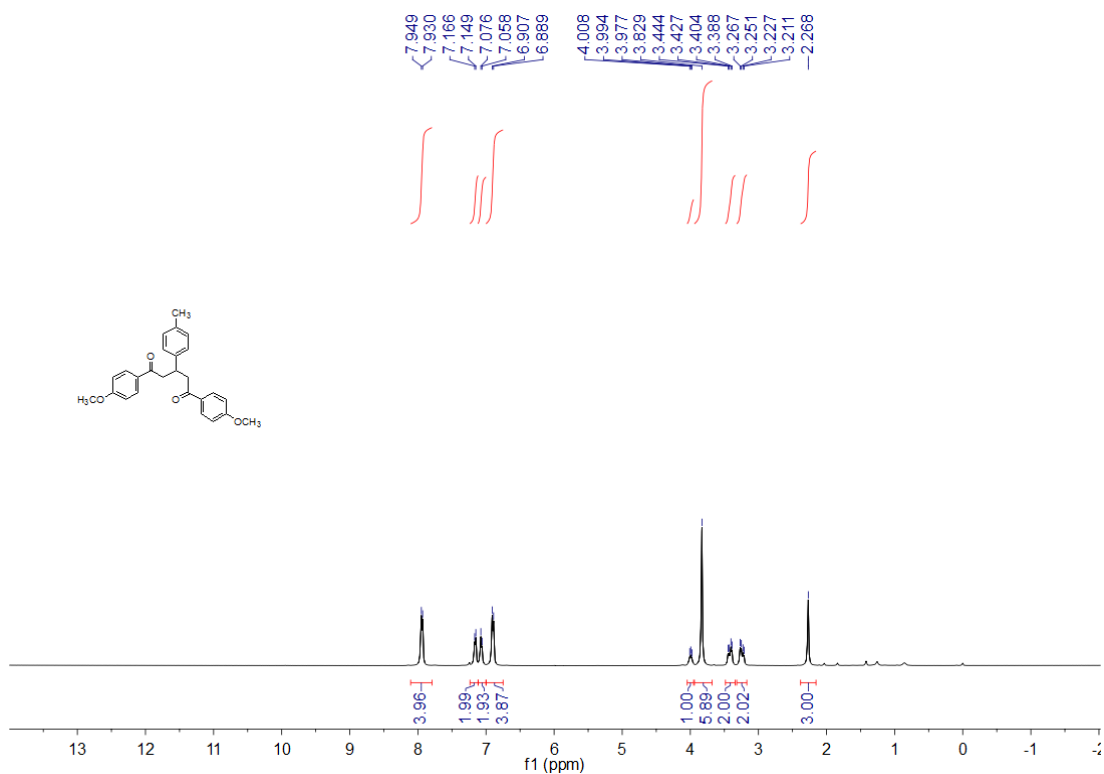

Fig 35. <sup>1</sup>H NMR of 1,5-bis-(4-methoxy-phenyl)-3-*p*-tolyl-pentane-1,5-dione (2l)

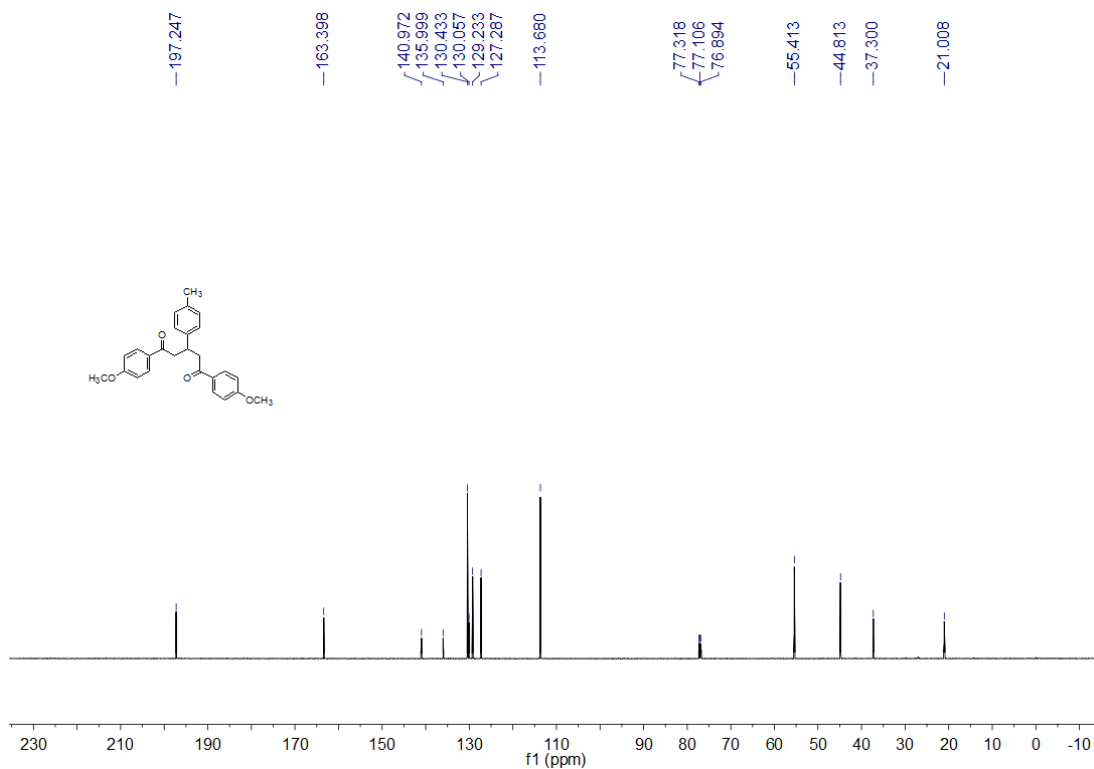

Fig 36. <sup>13</sup>C NMR of 1,5-bis-(4-methoxy-phenyl)-3-p-tolyl-pentane-1,5-dione (2l)

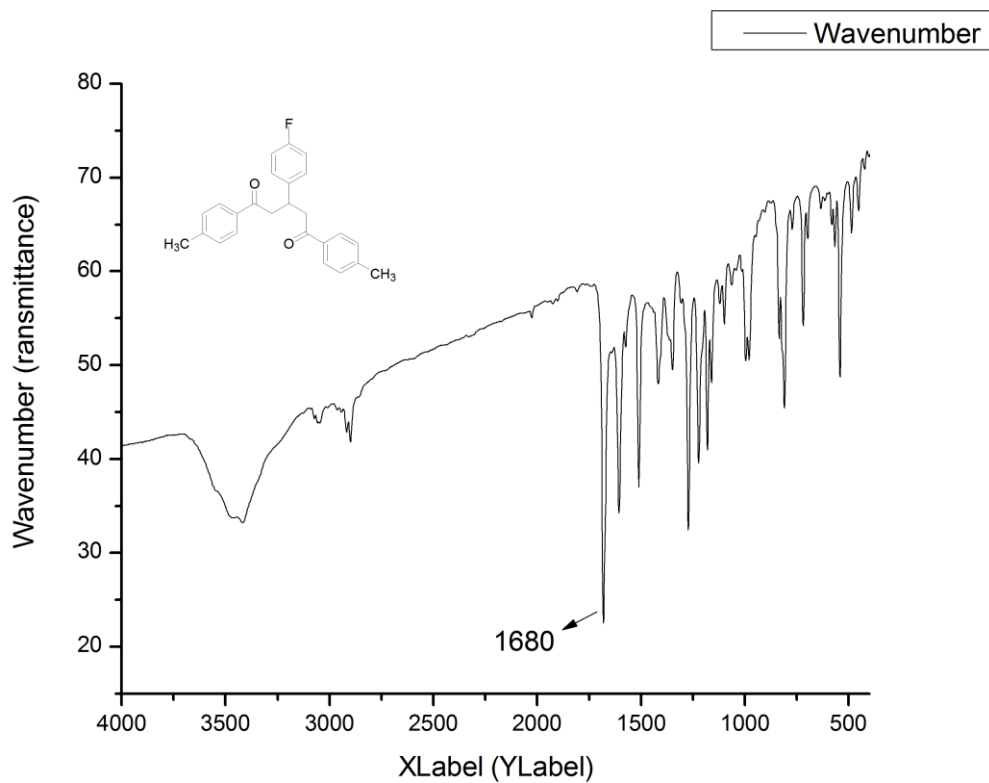

Fig 37. IR of 3-(4-fluoro-phenyl)-1,5-di-p-tolyl-pentane-1,5-dione (2m)

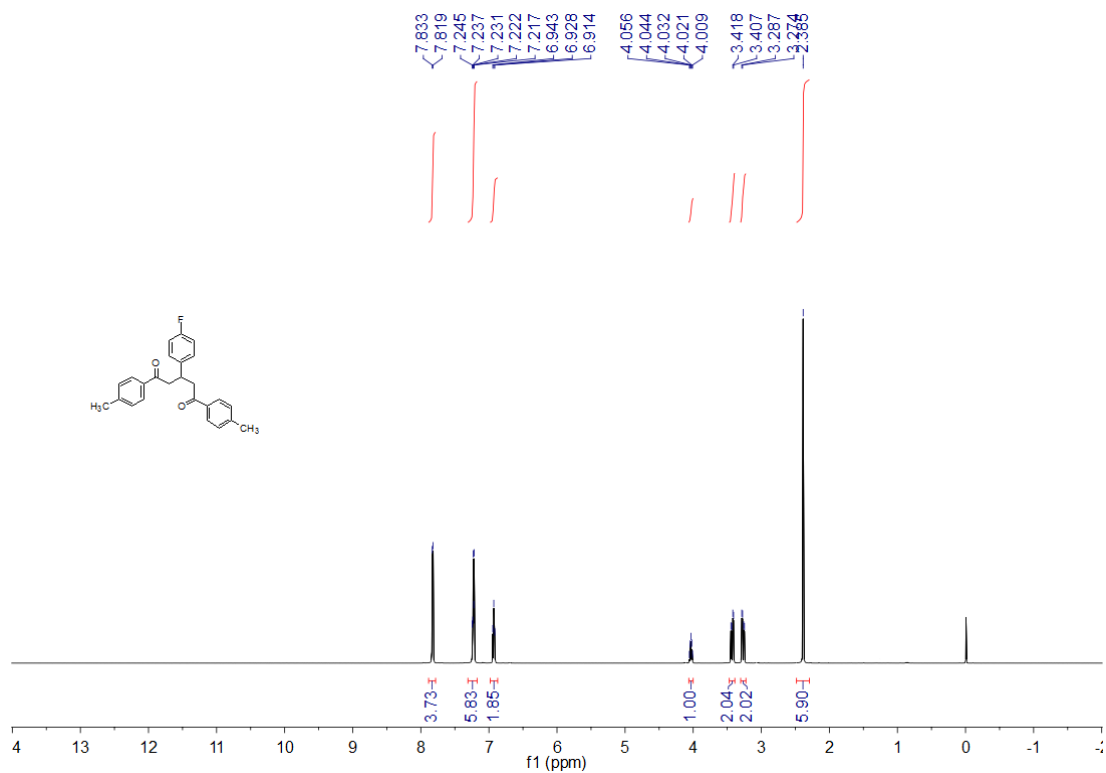

Fig 38. <sup>1</sup>H NMR of 3-(4-fluoro-phenyl)-1,5-di-*p*-tolyl-pentane-1,5-dione (2m)

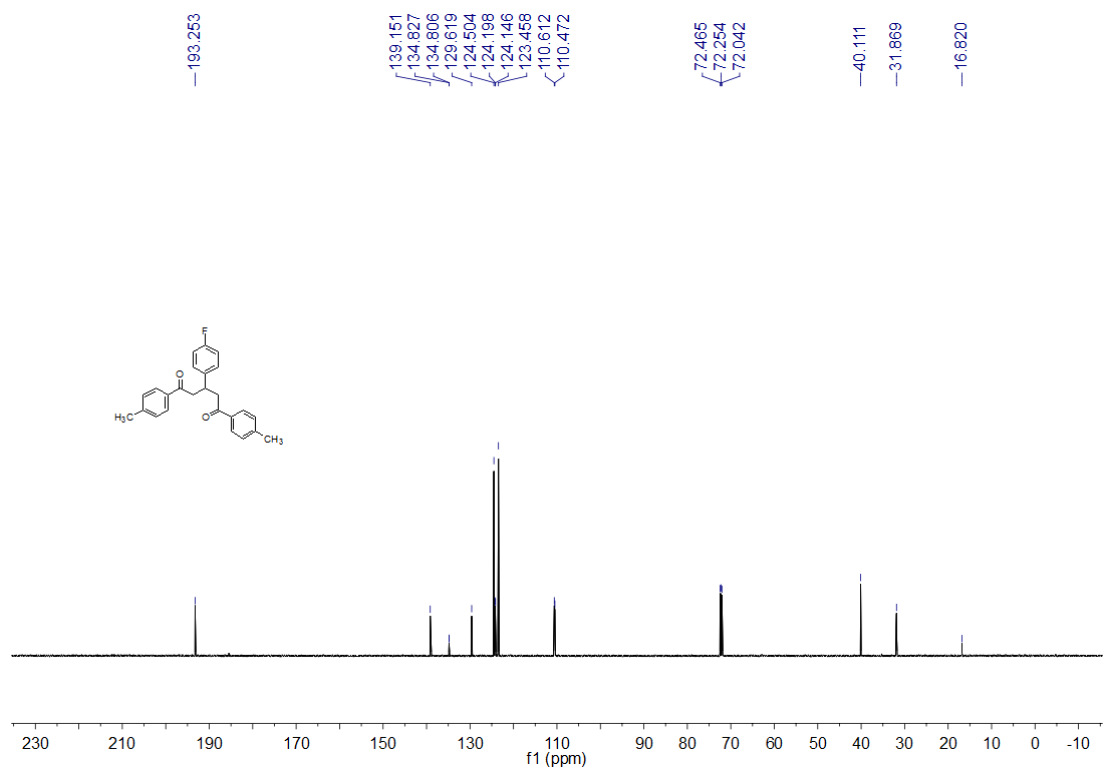

Fig 39. <sup>13</sup>C NMR of 3-(4-fluoro-phenyl)-1,5-di-*p*-tolyl-pentane-1,5-dione (2m)

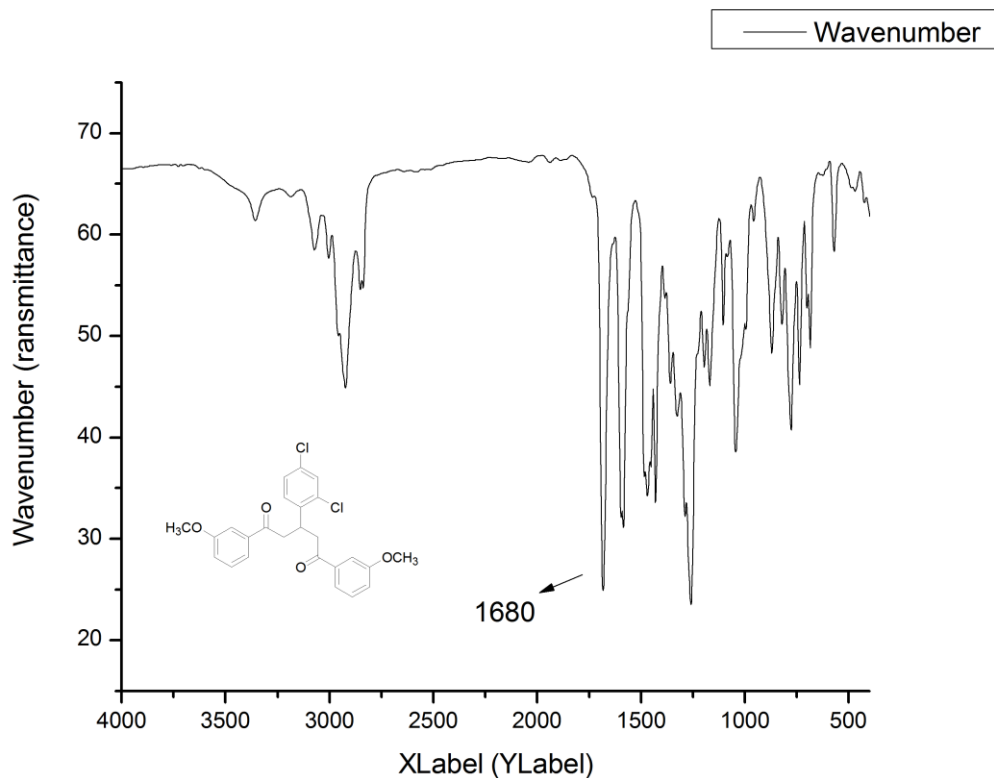

Fig 40. IR of 3-(2,4-dichloro-phenyl)-1,5-bis-(3-methoxy-phenyl)-pentane-1,5-dione (2n)

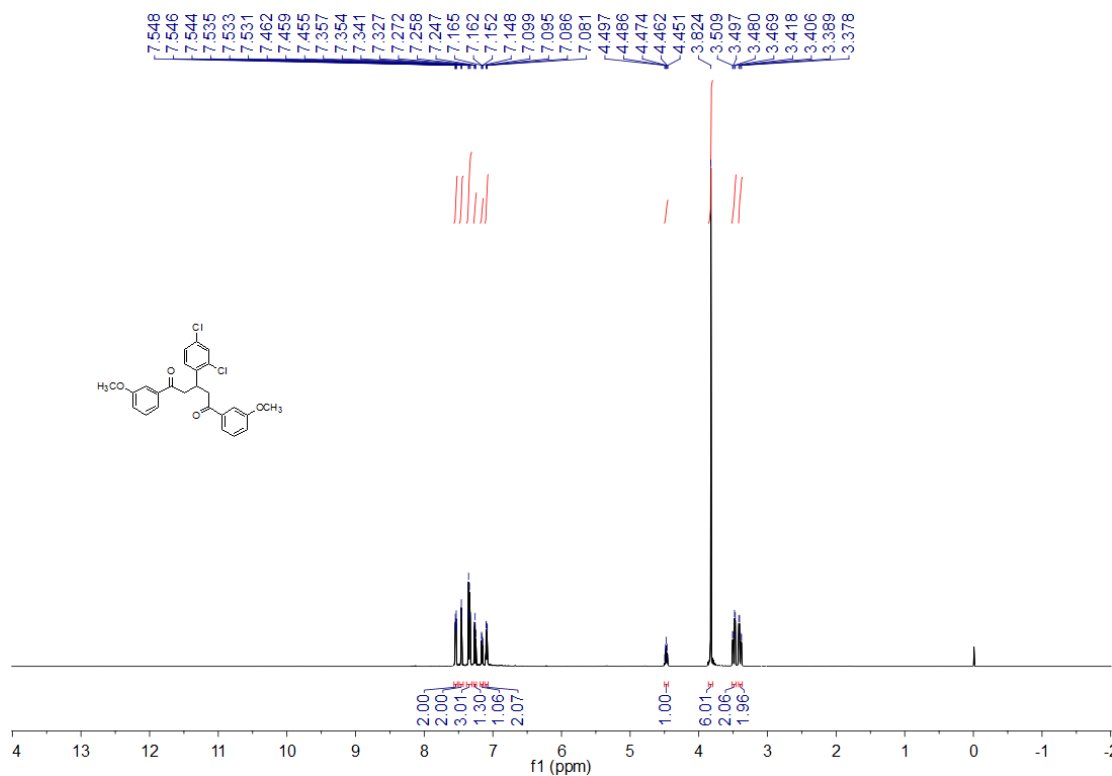

Fig 41.  $^1\text{H}$  NMR of

3-(2,4-dichloro-phenyl)-1,5-bis-(3-methoxy-phenyl)-pentane-1,5-dione (2n)

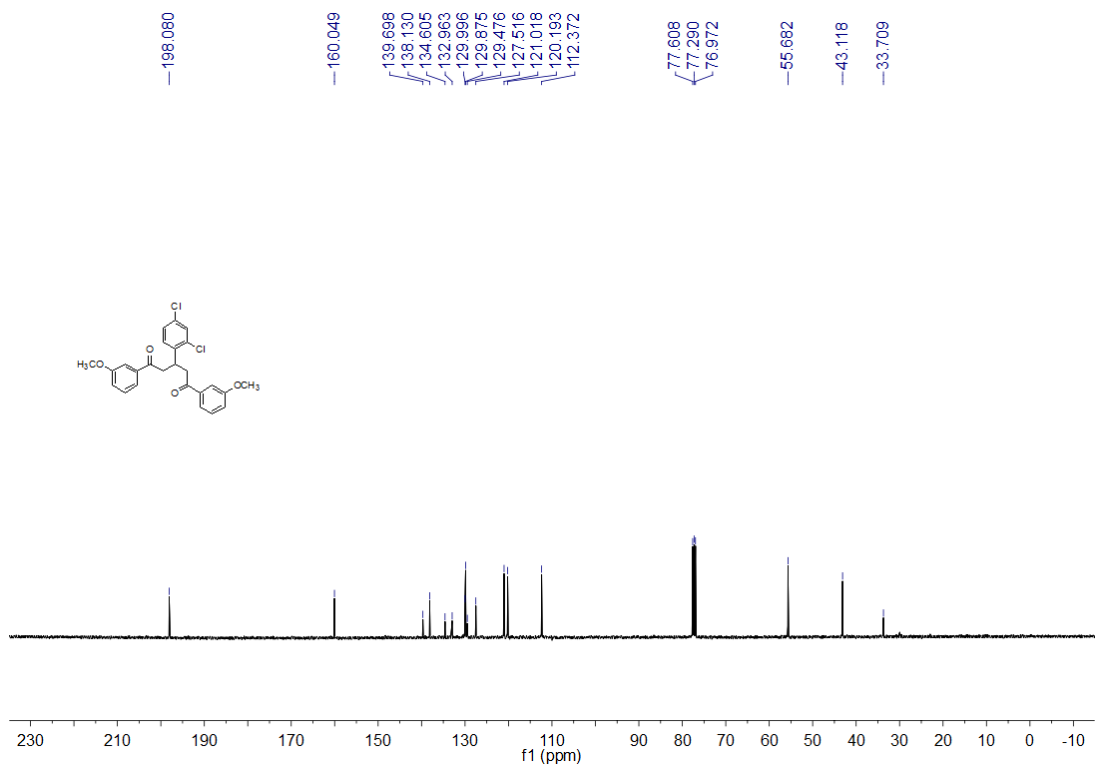

Fig 42.  $^{13}\text{C}$  NMR of

3-(2,4-dichloro-phenyl)-1,5-bis-(3-methoxy-phenyl)-pentane-1,5-dione (2n)

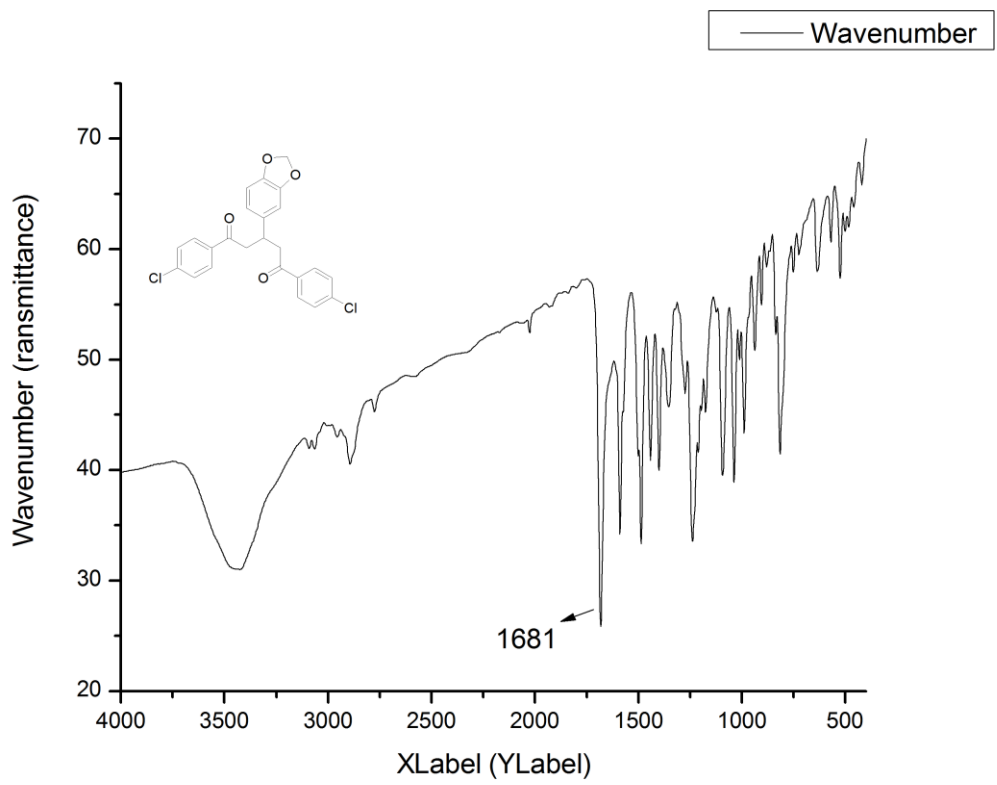

Fig 43. IR of

**3-benzo[1,3]dioxol-5-yl-1,5-bis-(4-chloro-phenyl)-pentane-1,5-dione (2o)**

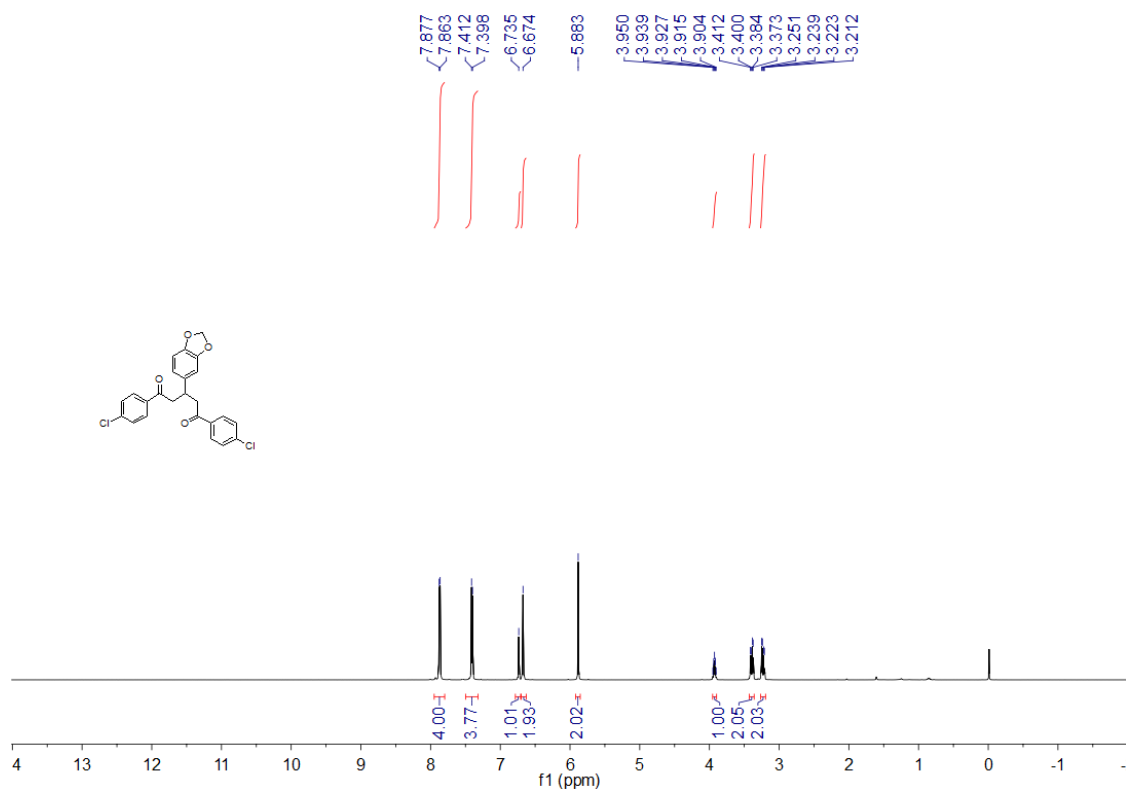

**Fig 44. <sup>1</sup>H NMR of 3-benzo[1,3]dioxol-5-yl-1,5-bis-(4-chloro-phenyl)-pentane-1,5-dione (2o)**

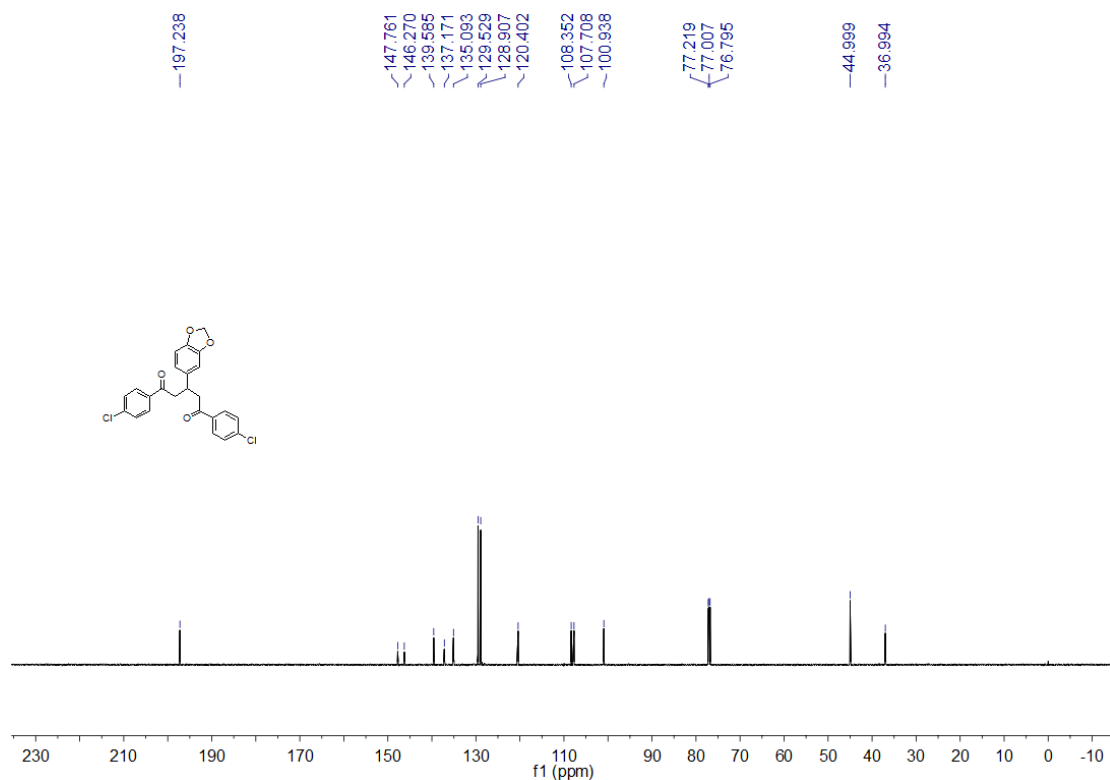

**Fig 45. <sup>13</sup>C NMR of**

**3-benzo[1,3]dioxol-5-yl-1,5-bis-(4-chloro-phenyl)-pentane-1,5-dione (2o)**

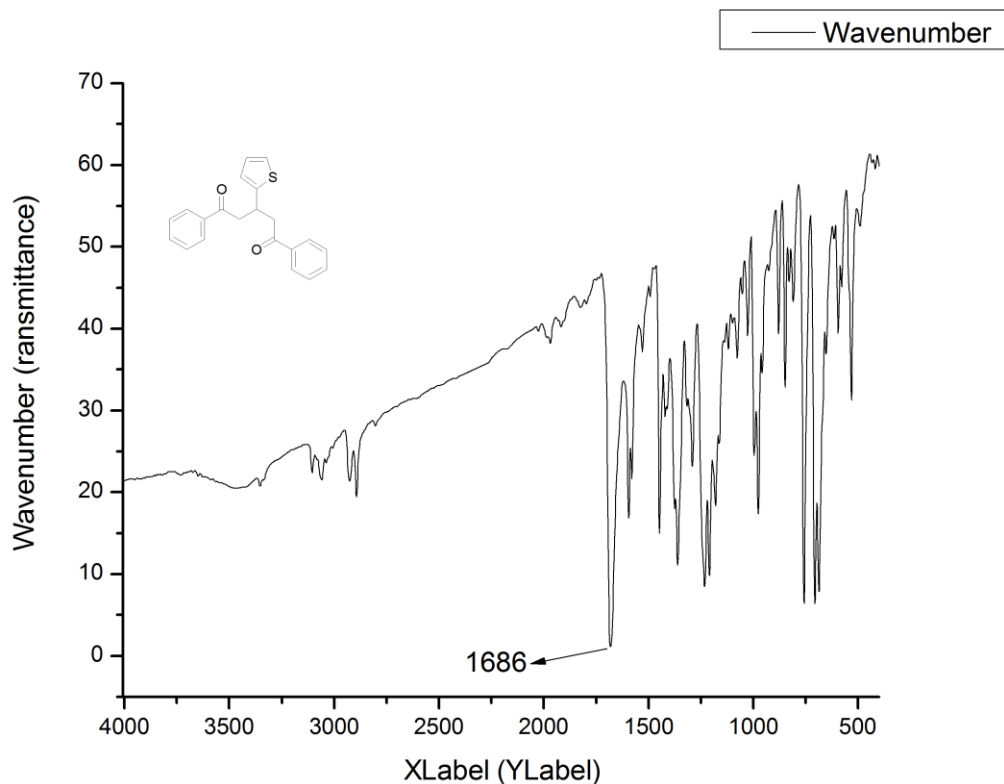

**Fig 46. IR of 1,5-diphenyl-3-thiophen-2-yl-pentane-1,5-dione (2p)**

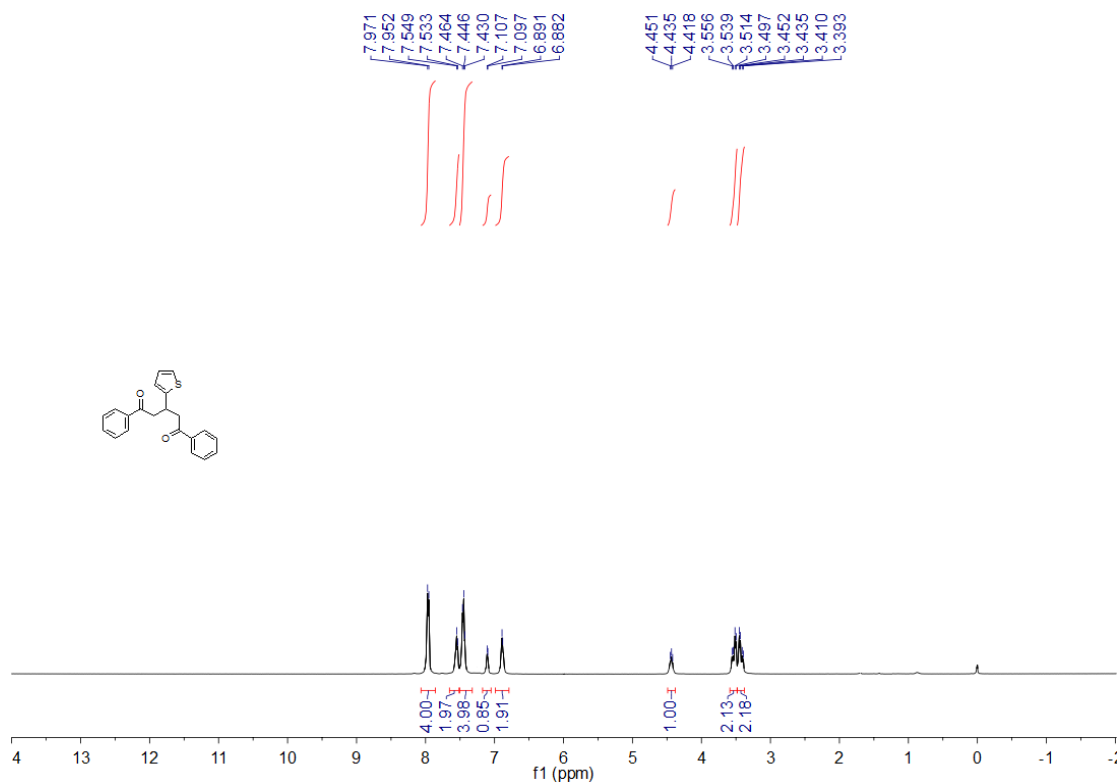

**Fig 47. <sup>1</sup>H NMR of 1,5-diphenyl-3-thiophen-2-yl-pentane-1,5-dione (2p)**



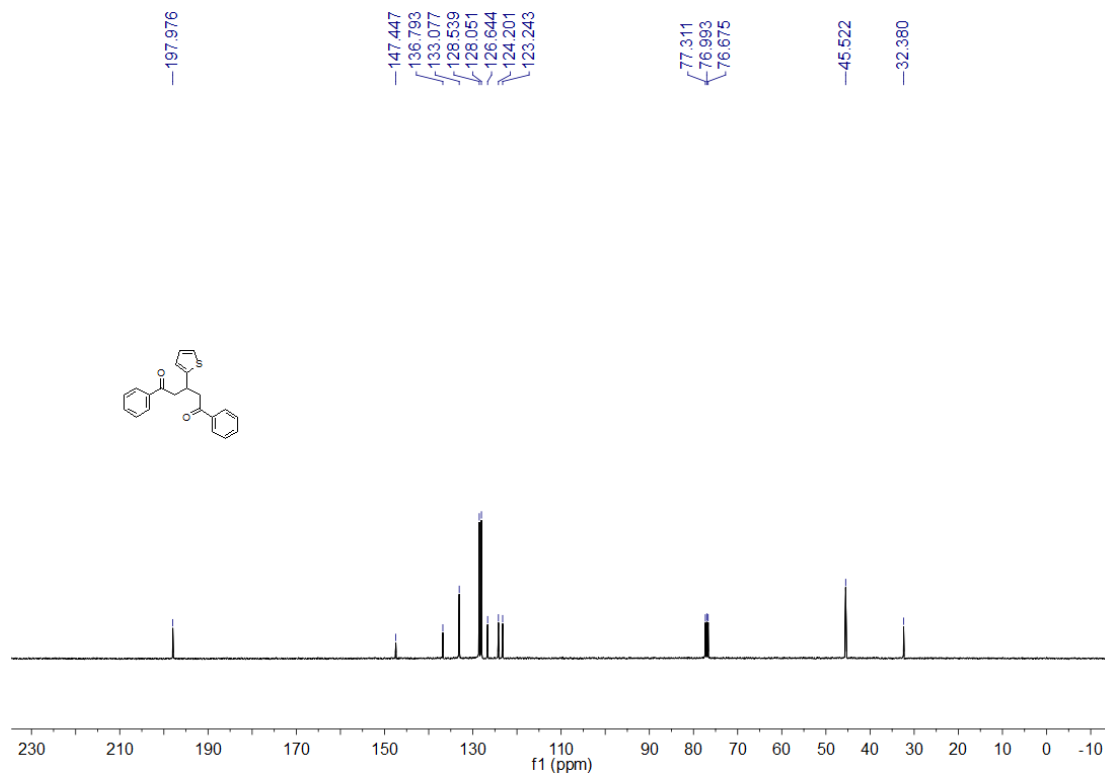

Fig 48.  $^{13}\text{C}$  NMR of 1,5-diphenyl-3-thiophen-2-yl-pentane-1,5-dione (2p)
